# Supplementary material
Source: Research Square preprint supplement (doi:10.21203/rs.3.rs-9160774/v1)
Supplement: Supplementary file 1 [file b916a46b94f0ac5a04bb8cd1.docx]

#### Unequal health returns of healthy lifestyles across countries: the role of social and environmental contexts in healthy ageing

Running title: Unequal Health Returns of Healthy Lifestyles

**Heng Wang¹, Yining Zhang¹, Yaqi Zhang¹, Yang Pei¹, Moluan Zhang², Jun Li¹, Koh-Hei Sonoda3, Jinghua Jiao4,#, Chingyu Cheng5,6,7,8,#, Lei Liu9,10,#, Han Zhang¹,#**

1 Department of Ophthalmology, First Hospital of China Medical University, Shenyang, China.

2 School of Medicine, Gifu University, Gifu City, Japan.

3 Department of Ophthalmology, Graduate School of Medical Sciences, Kyushu University, Fukuoka, Japan.

4. Department of Anesthesiology, The Affiliated Panyu Central Hospital, Guangzhou Medical University, Guangzhou, China.

5. Singapore Eye Research Institute, Singapore National Eye Centre, Singapore.

6. Centre for Innovation and Precision Eye Health, Yong Loo Lin School of Medicine, National University of Singapore, Singapore.

7. Department of Ophthalmology, Yong Loo Lin School of Medicine, National University of Singapore, Singapore.

8. Ophthalmology & Visual Sciences Academic Clinical Program (Eye ACP), Duke-NUS Medical School, Singapore.

9. Department of Ophthalmology, Guangdong Eye Institute, Guangdong Provincial People's Hospital (Guangdong Academy of Medical Sciences), Southern Medical University, Guangzhou, China.

10. Medical Big Data Center, Guangdong Provincial People's Hospital (Guangdong Academy of Medical Sciences), Southern Medical University, Guangzhou, China.

# Correspondence to Jinghua Jiao, Department of Anesthesiology, The Affiliated Panyu Central Hospital, Guangzhou Medical University, Guangzhou, China. Email: jean0905@163.com; Chingyu Cheng, Singapore Eye Research Institute, Singapore National Eye Centre, Singapore; Centre for Innovation and Precision Eye Health, Yong Loo Lin School of Medicine, National University of Singapore, Singapore; Department of Ophthalmology, Yong Loo Lin School of Medicine, National University of Singapore, Singapore; Ophthalmology & Visual Sciences Academic Clinical Program (Eye ACP), Duke-NUS Medical School, Singapore; Email: chingyu.cheng@nus.edu.sg; Lei Liu, Medical Big Data Center, Guangdong Provincial People's Hospital (Guangdong Academy of Medical Sciences), Southern Medical University, Guangzhou, China. Email: liulei@gdph.org.cn; Han Zhang, Department of Ophthalmology, First Hospital of China Medical University, Shenyang, China. Email: zhanghan73@126.com.

[1. Cohort design and analytic time windows 2](#_Toc23519)

[2. Harmonised items used to derive the Healthy Ageing Index (HAI) 3](#_Toc12152)

[3. Ethical Approval of Cohort Studies 6](#_Toc20609)

[4. Definition of Healthy Lifestyle Score (HLS) 7](#_Toc24471)

[Supplementary References： 8](#_Toc19128)

[5. ATHLOS Healthy Ageing Index: IRT model and score computation 9](#_Toc13146)

[6. Directed acyclic graph 11](#_Toc25040)

[7. Study flow diagram 12](#_Toc10763)

[8. Data missing characteristics before multiple imputation 14](#_Toc28786)

[9. Meta-regression results and model coefficients 17](#_Toc12839)

[10. Standardized marginal means of eHAYs (primary longitudinal outcome) 25](#_Toc6071)

[11. Sensitivity: robustness to latent-class assumptions for eHAYs 26](#_Toc27313)

[12. Sensitivity: agreement between model-based eHAYs and raw-data integration 27](#_Toc7097)

[13. Sensitivity: Standardized Marginal Prediction Model for Longitudinal eHAYs under Different τ-year Window 28](#_Toc11244)

[14. Sensitivity: Cross-sectional HAI standardized prediction marginal model excluding the lowest baseline HAI 29](#_Toc28125)

[15. Sensitivity: Meta-regression results and model coefficients using the average SDOH from previous years 30](#_Toc31514)

###### Cohort design and analytic time windows


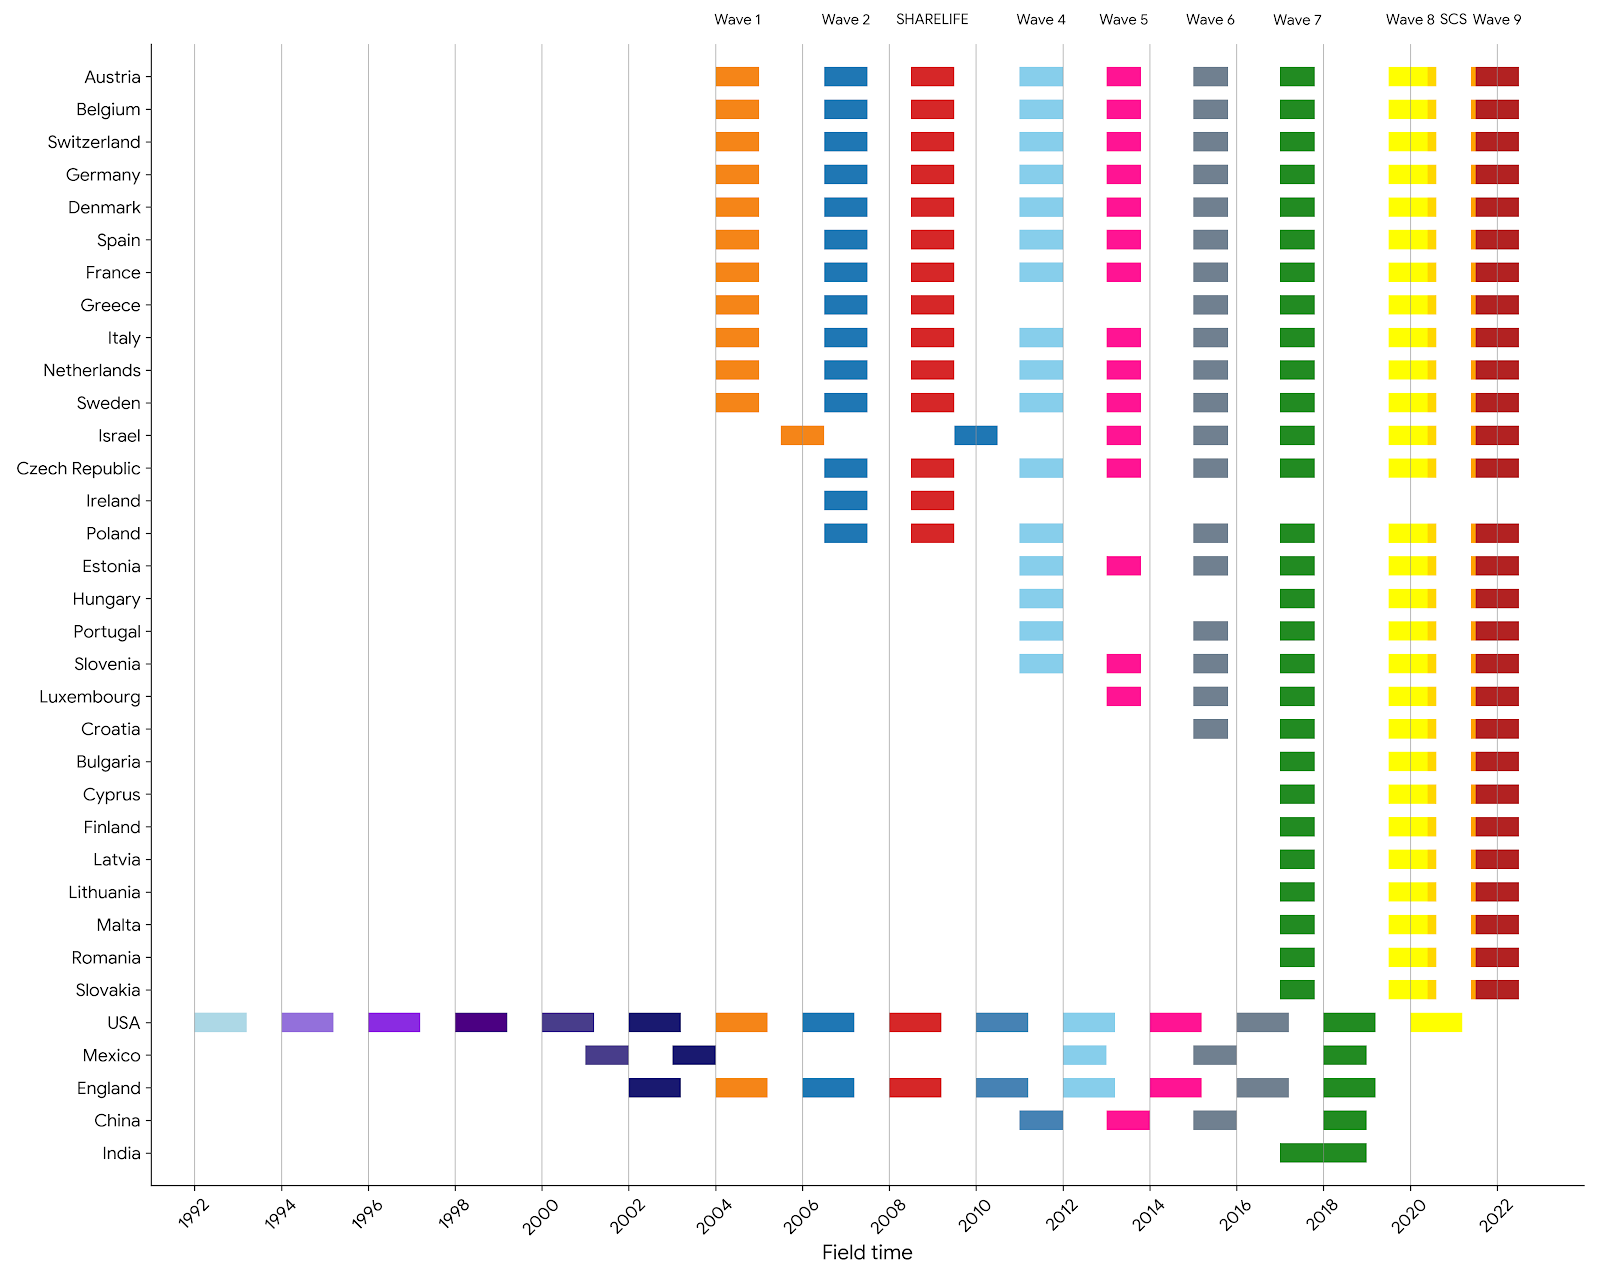


###### Harmonised items used to derive the Healthy Ageing Index (HAI)

| **Item** | **Definition** | **CHARLS** | **ELSA** | **HRS** | **LASI** | **MHAS** | **SHARE** |
| --- | --- | --- | --- | --- | --- | --- | --- |
| Memory | Self-reported ratings of memory at the time of the interview. | R3SLFMEM | R8SLFMEM | R13SLFMEM |  | R5SLFMEM | R8SLFMEM |
| Immediate recall | Immediate recall of common nouns from a list. | R3IMRC | R8IMRC | R13IMRC | R1IMRC | R5IMRC8 | R8IMRC |
| Delayed recall | Test that assesses delayed recall using the common nouns from the list previously employed for measuring Immediate recall. | R3DLRC | R8DLRC | R13DLRC | R1DLRC | R5DLRC8 | R8DLRC |
| Verbal fluency | Test that assesses verbal (semantic) fluency |  | R8VERBF |  |  | R5VERBF | R8VERBF |
| Orientation in time | Difficulties for orientation in time, evaluated by a set of questions about the date and day of the week. | R3ORIENT | R8ORIENT | R13ORIENT | R1ORIENT |  | R8ORIENT |
| Processing speed | Test which assesses processing speed. |  |  |  |  | R5VSCAN |  |
| Numeracy | Test that assesses numeracy. |  | R8NUMER_E |  | R1COMPU |  | R8NUMER_S |
| Sleeping | Sleeping problems | R3SLEEPRL | R8SLEEPR | R13SLEEPR | R1FALLSLP | R5SLEEPR | R8SLEEP |
| Pain | It measures if the participant experiences some degree of pain or if the participant does not present any pain at all. | DA041 | R8PAINFR | R13PAINLV | R1PAINFR | R5PAINFR | R8PAINFR |
| Energy | Self-reported high level of energy experienced at the time of the interview. | R3EFFORTL | R8FENERG | R13EFFORT | R1EFFORTL | R5ENERG | R8FATIG |
| Urine incontinence | It measures if the participant has experienced loss of urine (or has used any special device for urine leakage) | R3URINA | R8URINAI | R13URINAI | R1URINAE |  |  |
| Near vision | Difficulties for near vision. | DA034 | R8NSIGHT | R13NSIGHT | R1NSIGHTA |  | R8NSIGHT |
| Far vision | Difficulties for far vision. | DA033 | R8DSIGHT | R13DSIGHT | R1DSIGHTA |  | R8DSIGHT |
| Eyesight | Difficulties in eye sight using glasses or corrective lens as usual. | DA005_3_ | R8SIGHT | R13SIGHT |  | R5SIGHT |  |
| Hearing in general | It measures if the participant experiences some difficulty for hearing (i.e., hearing someone talking on the other side of the room in a normal voice) or not, using a hearing aid as usual. | DA005_4_ | R8HEARING | R13HEARING | R1HEARCNDE | R5HEARING | R8HEARING |
| Hearing in a conversation | It measures if the participant experiences some difficulty (including total disability) for following a conversation (i.e., if there is a background noise, or several people talking) or not, using a hearing aid as usual. |  |  |  |  |  |  |
| Stooping, kneeling or crouching | Difficulty for stooping, kneeling or crouching | R3STOOPA | R8STOOPA | R13STOOPA |  | R5STOOPA | R8STOOPA |
| Lifting or carrying weights | Difficulty for lifting or carrying weights | R3LIFTA | R8LIFTA | R13LIFTA |  | R5LIFTA | R8LIFTA |
| Climbing stairs | Difficulty for climbing stairs | R3CLIMSA | R8CLIM1A | R13CLIM1A |  | R5CLIMSA | R8CLIM1A |
| Getting up | Difficulty for getting up from sitting down | R3CHAIRA | R8CHAIRA | R13CHAIRA |  | R5CHAIRA | R8CHAIRA |
| Walking | Difficulty for walking by yourself and without using any special equipment | R3WALK1KMA/R3WALK100A | R8WALK100A | R13WALKSA | R1WALK100A | R5WALK1A/R5WALKSA | R8WALK100A |
| Pulling or pushing | Difficulty for pulling or pushing large objects |  | R8PUSHA | R13PUSHA |  | R5PUSHA | R8PUSHA |
| Sitting | Difficulty for sitting for long periods | DB004 | R8SITA | R13SITA |  | R5SITA | R8SITA |
| Reaching or extending arms | Difficulty for reaching / extending arms | R3ARMSA | R8ARMSA | R13ARMSA |  | R5ARMSA | R8ARMSA |
| Walking speed | It is measured assessing the time that is taken to walk a distance. |  |  |  |  |  |  |
| Dizziness | Dizziness problems when walking on a level surface |  |  | R13DIZZY |  |  |  |
| Picking up | Difficulty for picking up things with fingers, e.g. picking up a coin. | R3DIMEA | R8DIMEA | R13DIMEA |  | R5DIMEA | R8DIMEA |
| Getting in or out of bed | Difficulty for getting in or out of bed | R3BEDA | R8BEDA | R13BEDA | R1BEDA | R5BEDA | R8BEDA |
| Bathing or showering | Difficulties for bathing or showering | R3BATHA | R8BATHA | R13BATHA | R1BATHA | R5BATHA | R8BATHA |
| Getting dressed | Difficulty for getting dressed | R3DRESSA | R8DRESSA | R13DRESSA | R1DRESSA | R5DRESSA | R8DRESSA |
| Moving around the home | Difficulty for moving around the home |  | R8WALKRA | R13WALKRA |  | R5WALKRA | R8WALKRA |
| Toilet | Difficulties for using the toilet | R3TOILTA | R8TOILTA | R13TOILTA | R1TOILTA | R5TOILTA | R8TOILTA |
| Eating | Difficulties for eating | R3EATA | R8EATA | R13EATA | R1EATA | R5EATA | R8EATA |
| Housework | Difficulties for doing housework | R3HOUSEWKA | R8HOUSEWKA | R13LIMHWRK |  |  | R8HOUSEWKA |
| Shopping | Difficulties for shopping groceries | R3SHOPA | R8SHOPA | R13SHOPA |  | R5SHOPA | R8SHOPA |
| Getting out of the house | Difficulties for getting out of the house |  |  |  |  |  |  |
| Meals | Difficulties in preparing meals | R3MEALSA | R8MEALSA | R13MEALSA |  | R5MEALSA | R8MEALSA |
| Map | Difficulties for using a map |  | R8MAPA | R13MAPA |  |  | R8MAPA |
| Money | Difficulties for managing money, bills, or expenses | R3MONEYA | R8MONEYA | R13MONEYA |  | R5MONEYA | R8MONEYA |
| Medications | Difficulties for taking medications | R3MEDSA | R8MEDSA | R13MEDSA |  | R5MEDSA | R8MEDSA |
| Telephone | Difficulties for using telephone | R3PHONEA | R8PHONEA | R13PHONEA |  |  | R8PHONEA |

*Note: Leaving a blank indicates that no usable data is available in the GAD coordinated dataset, possibly due to planning missing or changes in the follow-up questionnaire.*

###### Ethical Approval of Cohort Studies

| **Cohort** | **Country / region** | **Ethics approval** | **Approval ID** | **Informed consent** |
| --- | --- | --- | --- | --- |
| CHARLS | China | Approved by the Institutional Review Board (IRB) at Peking University | IRB00001052-11015 (main survey); IRB00001052-11014 (biomarker collection) | Written informed consent; separate consents covering main interview and biomarker/blood collection and storage |
| ELSA | UK | Approved by the National Research Ethics Service / Research Ethics Committees (wave-specific approvals) | Wave-specific REC references (Wave 1–Wave 11 listed by ELSA,https://www.elsa-project.ac.uk/ethical-approval) | Informed consent obtained (as documented in ELSA materials/publications) |
| HRS | United States | Approved by the University of Michigan Health Sciences and Behavioral Sciences IRB (HSBS) | HUM00061128 (protocol; plus related protocols listed in HRS IRB document) | Written/oral consent procedures described; additional written consent for specific linkages/biomarkers as applicable |
| SHARE | Europe (multi-country) | Ethics approvals centrally documented; additional country-specific approvals as required | Central approvals include University of Mannheim ethics committee (waves 1–4) and Max Planck Society Ethics Council (continuation); https://share-eric.eu/fileadmin/user_upload/Ethics_Documentation | Informed consent procedures implemented across participating countries (documentation described in SHARE materials) |
| LASI | India | Ethical approvals were obtained from the following collaborating organizations: Indian Council of Medical Research (ICMR), Delhi; IRB, International Institute for Population Sciences (IIPS), Mumbai; IRB, Harvard T.H. Chan School of Public Health (HSPH), Boston; IRB, University of Southern California (USC), Los Angeles; IRB, ICMR-National AIDS Research Institute (NARI), Pune; and IRB, Regional Geriatric Centres (RGCs), MoHFW. | IRB/ethics details are described in the cohort’s official documentation | Household and individual informed consent forms are embedded in the LASI Wave 1 survey instrument |
| MHAS | Mexico | Approved by the Institutional Review Board of the University of Texas Medical Branch (UTMB); approvals in Mexico also documented | UTMB IRB Protocol #11-061 | Informed consent obtained from all subjects (as stated in a peer-reviewed MHAS-based publication) |

###### Definition of Healthy Lifestyle Score (HLS)

The selection of the alcohol consumption threshold was primarily determined by the measurement methods used in the GAD harmonised datasets and the specific risks alcohol poses to the elderly. In the GAD harmonised datasets, most cohorts captured drinking frequency and quantity (typically in "glasses" via self-report) over intervals ranging from one day to one month. We standardized these measures into the number of drinks consumed per week. In the absence of specific ethanol-to-gram conversion data, this serves as the most feasible and comparable unit.

We defined high-risk or heavy drinking as consuming more than 7 drinks per week, based on the dose-response relationship between alcohol intake, all-cause mortality, and incident cardiovascular events. Research indicates that the nadir of all-cause mortality risk occurs at approximately <100 g of pure alcohol per week; risk for both mortality and cardiovascular disease begins to rise significantly beyond this point(1–3). Given evidence that older adults may be more sensitive to alcohol, we set the high-risk threshold at 100 g/week. This equates to 14.3 g of alcohol daily, which aligns closely with the U.S. "standard drink" (e.g., 12 oz of regular beer at 5% ABV, 5 oz of wine at 12% ABV, or 1.5 oz of 40% ABV distilled spirits). While this threshold may be lower than those found in some general guidelines, we consider it appropriate given that most guidelines are developed for general adults rather than the elderly. In summary, thresholds were pre-defined based on data availability and professional expertise. We acknowledge potential measurement errors, which would likely bias the estimation of Δ[L4–L1] toward the null.

Referencing similar studies, we categorized the population into current smokers and non-current smokers (the latter including never-smokers and former smokers). Research shows that among participants aged 60 and older, the pooled hazard ratio (HR) is 2.07 (95% CI: 1.82–2.36) for current smokers and 1.37 (95% CI: 1.25–1.49) for former smokers compared to never-smokers. The excess risk among smokers follows a dose-response relationship with consumption, while the risk for former smokers decreases consistently with the duration of cessation(4). The benefits of quitting are evident across all age groups, including those 80 and older(5). Study from NEJM indicates that smoking reduces life expectancy by at least 10 years compared to never-smoking; however, quitting before age 40 reduces the excess risk of death by approximately 90%.(6)

Thresholds for physical activity (PA) were likewise determined by cross-cohort data availability and the protective effects of PA in older populations. PA levels across all cohorts were self-reported, typically as the frequency of activity per week or month (often without precise durations or Metabolic Equivalent of Task [MET] values). To ensure comparability, we defined "active" as engaging in Moderate-to-Vigorous Physical Activity (MVPA) at least once per week. MVPA was generally defined in questionnaires as activities such as brisk walking, cycling, swimming, or running, including occupational physical activity. Some cohorts did not measure light-intensity activity. Studies show a significant inverse correlation and a non-linear dose-response relationship between total PA and mortality risk in the elderly. The greatest marginal benefit often occurs during the transition from inactivity to low-level activity, suggesting that even small amounts of PA can significantly reduce all-cause mortality in older adults(7). Among all types of exercise, MVPA has been proven to offer the greatest benefit, as light activity requires significantly longer durations to achieve similar energy expenditure. As with alcohol consumption, current definitions may involve measurement errors, likely resulting in conservative estimates of the overall association.

Regarding BMI (kg/m²), measured values were prioritized over self-reported values, with the latter used only when measurements were missing to maximize sample size. To ensure cross-cohort comparability and consistency with previous literature, we adopted the international WHO BMI classification framework. "Healthy weight" was defined as 18.5-25.0 kg/m², while deviations (underweight, overweight, and obesity) were classified as "unhealthy."

While some researchers propose the "BMI paradox"—suggesting that mild obesity (e.g., BMI = 27.0 kg/m²) may be protective for the elderly—meta-analyses have yielded inconsistent results. Specifically, meta-analyses indicate that for individuals aged 60, mortality is lowest within the 20.0–<25.0 kg/m² range(8). Furthermore, research shows that Asian populations exhibit higher cardiovascular and metabolic risks at lower BMI levels (18.5–24.0 kg/m²) than Western populations. However, since the Western cohorts (like HRS) in this study also contain significant Asian populations, applying a lower "healthy" BMI threshold specifically for CHARLS and LASI might introduce new biases. Therefore, we maintained 18.5-25.0 kg/m² as the uniform standard. As noted previously, this definition may lead to a conservative estimation of the overall associations.

Supplementary References：

1. Ortolá R, Sotos-Prieto M, García-Esquinas E, Galán I, Rodríguez-Artalejo F. Alcohol Consumption Patterns and Mortality Among Older Adults With Health-Related or Socioeconomic Risk Factors. JAMA Netw Open. 2024 Aug 1;7(8):e2424495.

2. Wood AM, Kaptoge S, Butterworth AS, Willeit P, Warnakula S, Bolton T, et al. Risk thresholds for alcohol consumption: combined analysis of individual-participant data for 599 912 current drinkers in 83 prospective studies. Lancet. 2018 Apr 14;391(10129):1513–23.

3. What Is A Standard Drink? | National Institute on Alcohol Abuse and Alcoholism (NIAAA) [Internet]. [cited 2026 Feb 4]. Available from: https://www.niaaa.nih.gov/alcohols-effects-health/what-standard-drink

4. Mons U, Müezzinler A, Gellert C, Schöttker B, Abnet CC, Bobak M, et al. Impact of smoking and smoking cessation on cardiovascular events and mortality among older adults: meta-analysis of individual participant data from prospective cohort studies of the CHANCES consortium. BMJ. 2015 Apr 20;350:h1551.

5. Gellert C, Schöttker B, Brenner H. Smoking and all-cause mortality in older people: systematic review and meta-analysis. Arch Intern Med. 2012 Jun 11;172(11):837–44.

6. Jha P, Ramasundarahettige C, Landsman V, Rostron B, Thun M, Anderson RN, et al. 21st-century hazards of smoking and benefits of cessation in the United States. N Engl J Med. 2013 Jan 24;368(4):341–50.

7. Ekelund U, Tarp J, Steene-Johannessen J, Hansen BH, Jefferis B, Fagerland MW, et al. Dose-response associations between accelerometry measured physical activity and sedentary time and all cause mortality: systematic review and harmonised meta-analysis. BMJ. 2019 Aug 21;366:l4570.

8. Global BMI Mortality Collaboration null, Di Angelantonio E, Bhupathiraju S, Wormser D, Gao P, Kaptoge S, et al. Body-mass index and all-cause mortality: individual-participant-data meta-analysis of 239 prospective studies in four continents. Lancet. 2016 Aug 20;388(10046):776–86.

###### ATHLOS Healthy Ageing Index: IRT model and score computation

The Healthy Ageing Index (HAI) was developed by the ATHLOS consortium to place individuals from multiple cohorts on a single, comparable “healthy ageing” latent trait scale derived from harmonised intrinsic capacity and functional ability items (K = 41; items coded as presence/absence of difficulty, with some continuous indicators dichotomised at the first quartile). HAI is based on a unidimensional two-parameter logistic item response theory model (2PL), in which the probability that person p endorses item i (response r = 0/1) is modelled as:

, where a_i is the item discrimination (slope), b_i is the item difficulty (location), and θ_p is the individual’s latent healthy ageing level; under the unidimensionality assumption, the likelihood of an individual response pattern is the product of item probabilities

. Item parameters were estimated using full-information maximum likelihood (EM with numerical quadrature), which natively accommodates missingness under standard IRT assumptions, and individual latent trait scores were obtained via expected a-posteriori (EAP) estimation using Bayes’ rule:

, with the EAP point estimate computed as

(approximated numerically). To demonstrate that the IRT model yields comparable scores across cohorts (despite cohorts having different subsets of available items), ATHLOS evaluated overall model fit and the unidimensionality/conditional-independence assumption using confirmatory factor analysis for categorical data under a limited-information estimator (diagonally weighted least squares), reporting standard fit indices (RMSEA, CFI, TLI); because categorical CFA requires complete item matrices, missing responses were imputed conditional on the fitted IRT model and preliminary θ estimates, and fit evaluation was repeated multiple times with negligible variation in indices, supporting stable global fit. Cohort-to-cohort comparability was further assessed by (i) computing intraclass correlation coefficients (ICC) between the main (global) scale scores and cohort-specific scores when the common-item parameters were fixed to the main-scale calibrations—high ICCs indicate that differences in item availability do not materially alter individuals’ relative standing—and (ii) explicitly addressing cross-study measurement non-invariance via differential item functioning (DIF) detection using an ordinal-logistic-regression IRT framework (nested models with θ, study, and θ×study terms; DIF flagged by clinically relevant changes in the θ coefficient), followed by Stocking–Lord equating to map cohort-specific metrics onto the main ATHLOS metric through a linear transformation with multiplicative and additive constants, (constants reported per study), thereby aligning test characteristic curves over a θ grid and ensuring a common unit and origin. Finally, equated latent trait scores were rescaled into an interpretable T-score metric to avoid negative/decimal values: , where higher T-scores indicate healthier ageing. In our research, to ensure cross-cohort comparability, we applied published item parameters.

| Presence or absence of difficulties | IRT parameter estimates and standard errors | | | |
| --- | --- | --- | --- | --- |
| Discrimination | | Difficulty | |
| Memory | 0.8332 | (0.0059) | -0.5914 | (0.0065) |
| Immediate recall | 0.6325 | (0.0049) | -0.9731 | (0.0092) |
| Delayed recall | 0.6714 | (0.0051) | -1.2130 | (0.0100) |
| Verbal fluency | 0.6080 | (0.0057) | -1.6981 | (0.0160) |
| Orientation in time | 0.8449 | (0.0078) | -1.7307 | (0.0155) |
| Processing speed | 0.5912 | (0.0144) | -1.9291 | (0.0453) |
| Numeracy | 1.0404 | (0.0118) | -1.9586 | (0.0203) |
| Sleeping | 0.8334 | (0.0052) | -0.5605 | (0.0057) |
| Experiences some degree of pain | 1.0616 | (0.0059) | -0.1463 | (0.0042) |
| Having high level of energy | 0.9119 | (0.0054) | -0.5781 | (0.0054) |
| Urinary incontinence | 1.0969 | (0.0111) | -2.3546 | (0.0196) |
| Near vision | 0.9438 | (0.0061) | -0.9104 | (0.0069) |
| Far vision | 1.2639 | (0.0075) | -1.1091 | (0.0062) |
| Eyesight using glasses or lens as usual | 0.9421 | (0.0086) | -1.5122 | (0.0126) |
| Hearing in general | 0.8212 | (0.0067) | -1.9818 | (0.0151) |
| Hearing in a conversation | 0.8426 | (0.0107) | -2.2121 | (0.0262) |
| Stooping,kneeling or crouching | 2.4717 | (0.0120) | -0.5059 | (0.0029) |
| Lifting or carrying weights | 2.7130 | (0.0134) | -0.7834 | (0.0031) |
| Climbing stairs | 2.7327 | (0.0137) | -0.7940 | (0.0031) |
| Getting up from sitting down | 2.4166 | (0.0125) | -0.8256 | (0.0035) |
| Walking by yourself and without any  equipment | 3.1335 | (0.0161) | -0.8763 | (0.0030) |
| Pulling or pushing large objects | 3.1691 | (0.0202) | -0.8848 | (0.0036) |
| Sitting for long periods | 2.0455 | (0.0114) | -1.1322 | (0.0047) |
| Reaching or extending arms | 2.1929 | (0.0129) | -1.4727 | (0.0054) |
| Walking speed | 0.8995 | (0.0111) | -1.6364 | (0.0160) |
| Dizziness when walking on a level surface | 1.3230 | (0.0128) | -1.7363 | (0.0142) |
| Picking up things with fingers | 2.3139 | (0.0156) | -1.8427 | (0.0068) |
| Getting in or out of bed | 3.4954 | (0.0239) | -1.4949 | (0.0044) |
| Bathing or showering | 3.5997 | (0.0253) | -1.5996 | (0.0045) |
| Getting dressed | 2.6935 | (0.0180) | -1.6404 | (0.0055) |
| Moving around the home | 3.4746 | (0.0271) | -1.6976 | (0.0053) |
| Using the toilet | 3.5668 | (0.0277) | -1.7960 | (0.0054) |
| Eating | 3.0627 | (0.0255) | -2.0989 | (0.0073) |
| Doing housework | 3.1663 | (0.0185) | -1.0530 | (0.0035) |
| Shopping for groceries | 4.3188 | (0.0376) | -1.3521 | (0.0045) |
| Getting out of the house | 3.4506 | (0.0377) | -1.3939 | (0.0056) |
| Difficulties in preparing meals | 3.8589 | (0.0360) | -1.5886 | (0.0058) |
| Using a map | 1.6814 | (0.0149) | -1.6329 | (0.0108) |
| Managing money,bills or expenses | 2.4045 | (0.0266) | -1.8498 | (0.0107) |
| Taking medications | 3.0022 | (0.0311) | -2.0162 | (0.0096) |
| Making telephone calls | 2.9271 | (0.0332) | -2.0392 | (0.0108) |

###### Directed acyclic graph

*
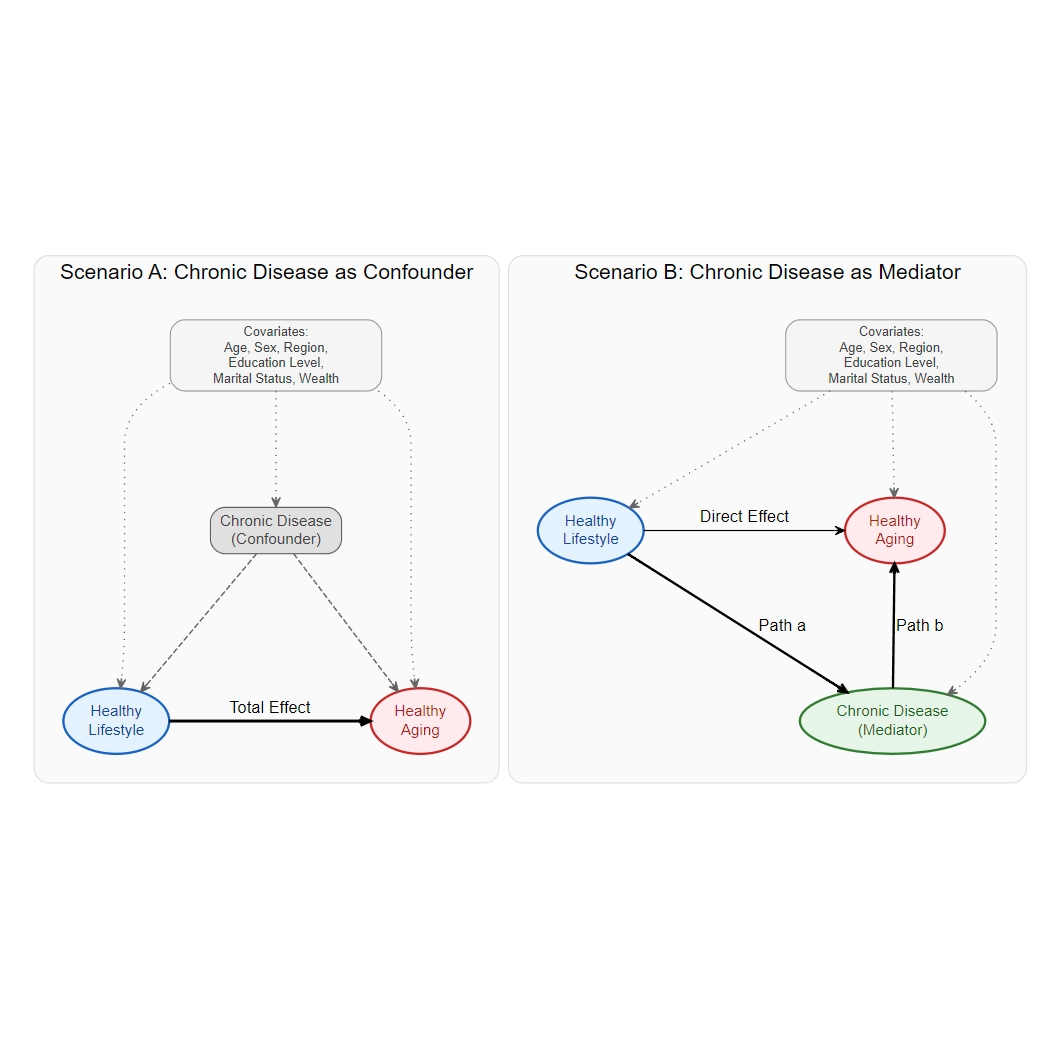
*

*In the diagram, blue represents exposure; red represents outcome; gray represents confounding factors; and green represents mediating factors. Dashed lines represent back-door path while solid line represent front-door path.*

###### Study flow diagram


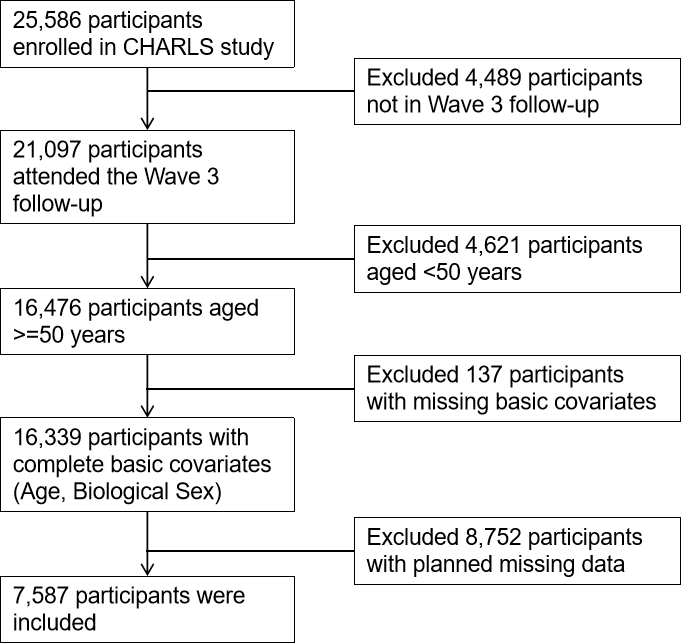

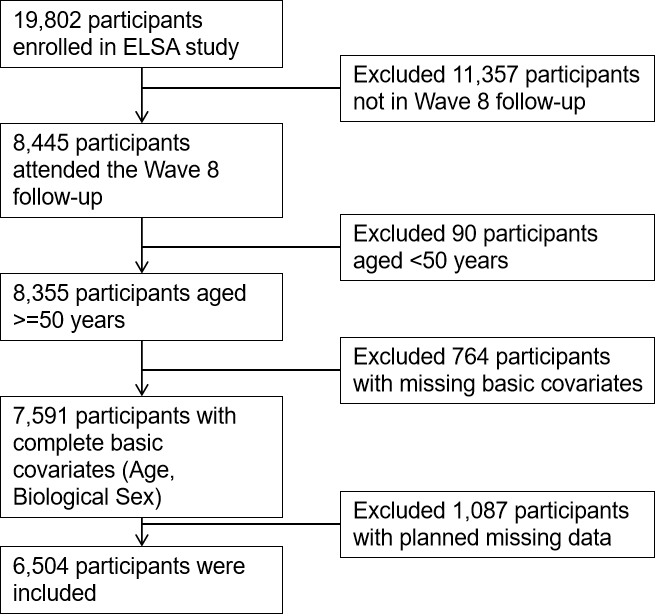

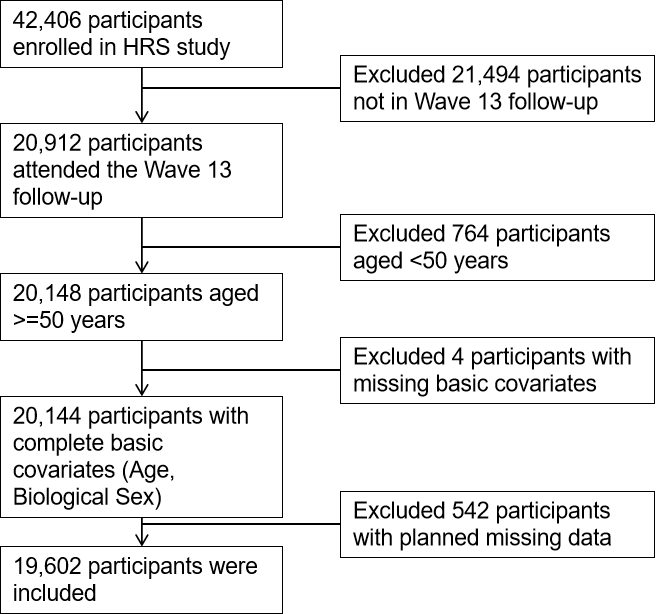

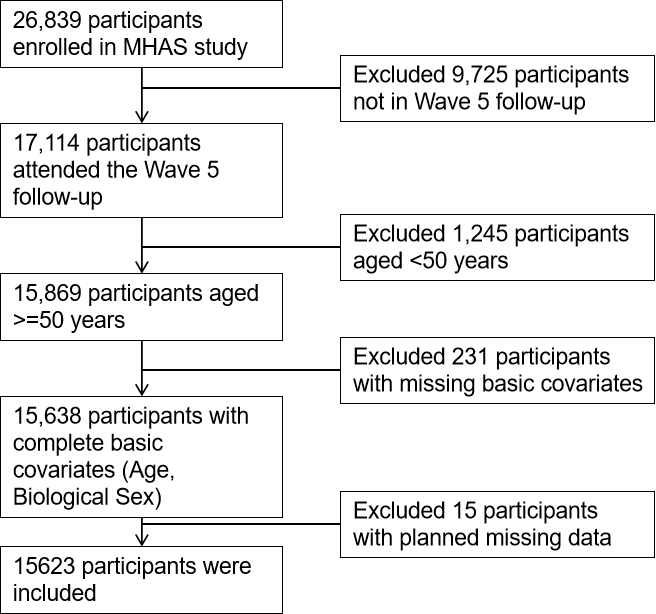

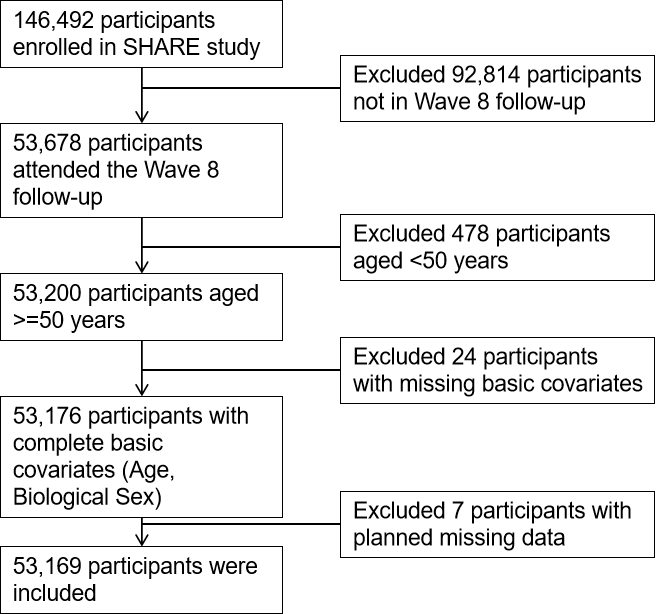

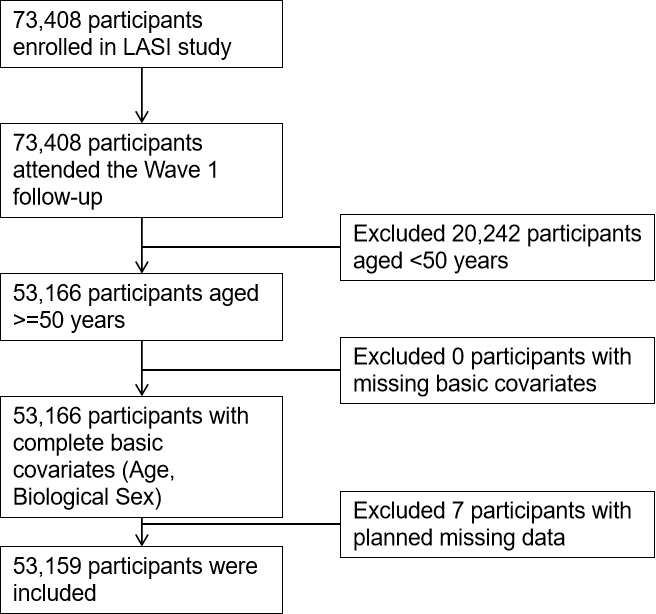


*Note:Planned missing data include Split-Questionnaire Design (where researchers, during the survey design phase, intentionally allow different respondents to answer different subsets of the questionnaire based on randomization principles). Implausible values were excluded (e.g., BMI > 100); observations with zero survey weights were removed.*

###### Data missing characteristics before multiple imputation

|  | CHARLS | | ELSA | | HRS | | LASI | | MHAS | | SHARE | |
| --- | --- | --- | --- | --- | --- | --- | --- | --- | --- | --- | --- | --- |
| Variable | Missing Count  (N) | Missing Percent | Missing Count  (N) | Missing Percent | Missing Count  (N) | Missing Percent | Missing Count  (N) | Missing Percent | Missing Count  (N) | Missing Percent | Missing Count  (N) | Missing Percent |
| Age | 0 | 0.00% | 0 | 0.00% | 0 | 0.00% | 0 | 0.00% | 0 | 0.00% | 0 | 0.00% |
| Bathing | 19 | 0.25% | 1 | 0.01% | 47 | 0.23% | 218 | 0.41% | 103 | 0.66% | 167 | 0.31% |
| BirthYear | 0 | 0.00% | 0 | 0.00% | 0 | 0.00% | 0 | 0.00% | 1 | 0.01% | 0 | 0.00% |
| BMI_Raw | 1331 | 17.54% | 1423 | 18.75% | 307 | 1.53% | 5451 | 10.25% | 1781 | 11.40% | 1383 | 2.60% |
| Chronic_Arthr | 610 | 8.04% | 0 | 0.00% | 0 | 0.00% | 183 | 0.34% | 16 | 0.10% | 119 | 0.22% |
| Chronic_Cancr | 611 | 8.05% | 0 | 0.00% | 0 | 0.00% | 139 | 0.26% | 13 | 0.08% | 156 | 0.29% |
| Chronic_Diabe | 671 | 8.84% | 0 | 0.00% | 0 | 0.00% | 143 | 0.27% | 23 | 0.15% | 138 | 0.26% |
| Chronic_Heart | 654 | 8.62% | 0 | 0.00% | 0 | 0.00% | 138 | 0.26% | 8 | 0.05% | 140 | 0.26% |
| Chronic_Hibp | 631 | 8.32% | 0 | 0.00% | 0 | 0.00% | 141 | 0.27% | 13 | 0.08% | 97 | 0.18% |
| Chronic_Lung | 607 | 8.00% | 0 | 0.00% | 0 | 0.00% | 139 | 0.26% | 11 | 0.07% | 154 | 0.29% |
| Chronic_Stroke | 603 | 7.95% | 0 | 0.00% | 0 | 0.00% | 139 | 0.26% | 7 | 0.04% | 150 | 0.28% |
| Climbing_stairs | 96 | 1.27% | 1 | 0.01% | 322 | 1.60% | NA | NA | 1826 | 11.69% | 166 | 0.31% |
| Delayed_recall | 275 | 3.62% | 410 | 5.40% | 929 | 4.62% | 652 | 1.23% | 1261 | 8.07% | 1478 | 2.78% |
| Dressing | 12 | 0.16% | 1 | 0.01% | 57 | 0.28% | 218 | 0.41% | 1291 | 8.26% | 167 | 0.31% |
| Drink_Ever | 11 | 0.14% | 1211 | 15.96% | 15 | 0.07% | 436 | 0.82% | 8 | 0.05% | NA | NA |
| Drink_Freq | 26 | 0.34% | 1181 | 15.56% | 75 | 0.37% | 436 | 0.82% | 87 | 0.56% | 164 | 0.31% |
| Drink_Quant | 26 | 0.34% | 1161 | 15.30% | 81 | 0.40% | NA | NA | 78 | 0.50% | 221 | 0.42% |
| Eating | 12 | 0.16% | 1 | 0.01% | 55 | 0.27% | 218 | 0.41% | 108 | 0.69% | 167 | 0.31% |
| Edu_Raw | 0 | 0.00% | 0 | 0.00% | 0 | 0.00% | 0 | 0.00% | 0 | 0.00% | 0 | 0.00% |
| Energy | 145 | 1.91% | 1156 | 15.23% | 963 | 4.78% | 1513 | 2.85% | 1304 | 8.35% | 1101 | 2.07% |
| Eyesight | 666 | 8.78% | 6 | 0.08% | 63 | 0.31% | NA | NA | 1296 | 8.29% | NA | NA |
| Far_vision | 23 | 0.30% | 397 | 5.23% | 47 | 0.23% | 167 | 0.31% | NA | NA | 252 | 0.47% |
| Gender_Raw | 0 | 0.00% | 0 | 0.00% | 0 | 0.00% | 0 | 0.00% | 0 | 0.00% | 0 | 0.00% |
| Getting_in_out_bed | 12 | 0.16% | 1 | 0.01% | 70 | 0.35% | 218 | 0.41% | 105 | 0.67% | 167 | 0.31% |
| Getting_up | 16 | 0.21% | 1 | 0.01% | 105 | 0.52% | NA | NA | 1302 | 8.33% | 166 | 0.31% |
| Hearing_in_general | 882 | 11.63% | 4 | 0.05% | 26 | 0.13% | 151 | 0.28% | 1279 | 8.19% | 186 | 0.35% |
| Housework | 11 | 0.14% | 1 | 0.01% | 213 | 1.06% | NA | NA | NA | NA | 167 | 0.31% |
| Immediate_recall | 218 | 2.87% | 452 | 5.96% | 929 | 4.62% | 652 | 1.23% | 1261 | 8.07% | 1365 | 2.57% |
| Lifting_carrying | 34 | 0.45% | 1 | 0.01% | 301 | 1.50% | NA | NA | 1430 | 9.15% | 166 | 0.31% |
| Map | NA | NA | 1 | 0.01% | 1293 | 6.42% | NA | NA | NA | NA | 167 | 0.31% |
| Marital_Raw | 1 | 0.01% | 3 | 0.04% | 7 | 0.03% | 3 | 0.01% | 0 | 0.00% | 175 | 0.33% |
| Meals | 34 | 0.45% | 1 | 0.01% | 436 | 2.17% | NA | NA | 1673 | 10.71% | 167 | 0.31% |
| Medications | 28 | 0.37% | 1 | 0.01% | 271 | 1.35% | NA | NA | 1349 | 8.63% | 167 | 0.31% |
| Memory | 35 | 0.46% | 441 | 5.81% | 929 | 4.62% | NA | NA | 1349 | 8.63% | 905 | 1.70% |
| Money | 59 | 0.78% | 1 | 0.01% | 462 | 2.30% | NA | NA | 1322 | 8.46% | 167 | 0.31% |
| Moving_around | NA | NA | 1 | 0.01% | 64 | 0.32% | NA | NA | 109 | 0.70% | 167 | 0.31% |
| Near_vision | 31 | 0.41% | 398 | 5.24% | 40 | 0.20% | 220 | 0.41% | NA | NA | 253 | 0.48% |
| Numeracy | NA | NA | NA | NA | NA | NA | 652 | 1.23% | NA | NA | 36688 | 69.00% |
| Orientation_in_time | 603 | 7.95% | 510 | 6.72% | 6934 | 34.45% | 652 | 1.23% | NA | NA | 188 | 0.35% |
| PA_Light_Days | 64 | 0.84% | 2 | 0.03% | 60 | 0.30% | NA | NA | NA | NA | NA | NA |
| PA_Mod_Days | 73 | 0.96% | 2 | 0.03% | 82 | 0.41% | 437 | 0.82% | NA | NA | 162 | 0.30% |
| PA_Vig_Days | 54 | 0.71% | 2 | 0.03% | 102 | 0.51% | 448 | 0.84% | 1273 | 8.15% | 178 | 0.33% |
| Pain | 6 | 0.08% | 406 | 5.35% | 129 | 0.64% | 182 | 0.34% | 1268 | 8.11% | 193 | 0.36% |
| Picking_up | 24 | 0.32% | 1 | 0.01% | 87 | 0.43% | NA | NA | 1299 | 8.31% | 166 | 0.31% |
| Pulling_pushing | NA | NA | 1 | 0.01% | 443 | 2.20% | NA | NA | 1475 | 9.44% | 166 | 0.31% |
| Processing_speed | NA | NA | NA | NA | NA | NA | NA | NA | 1261 | 8.07% | NA | NA |
| Reaching_arms | 15 | 0.20% | 1 | 0.01% | 93 | 0.46% | NA | NA | 1298 | 8.31% | 166 | 0.31% |
| Rural_Raw | 0 | 0.00% | NA | NA | 1610 | 8.00% | 0 | 0.00% | 0 | 0.00% | 2534 | 4.77% |
| Shopping | 31 | 0.41% | 1 | 0.01% | 331 | 1.64% | NA | NA | 1469 | 9.40% | 167 | 0.31% |
| Sitting | 16 | 0.21% | 1 | 0.01% | 147 | 0.73% | NA | NA | 1304 | 8.35% | 166 | 0.31% |
| Sleeping | 74 | 0.98% | 443 | 5.84% | 970 | 4.82% | 175 | 0.33% | 1277 | 8.17% | 1038 | 1.95% |
| Smoke_Ever | 2 | 0.03% | 92 | 1.21% | 85 | 0.42% | 447 | 0.84% | 14 | 0.09% | 63 | 0.12% |
| Smoke_Now | 5 | 0.07% | 32 | 0.42% | 91 | 0.45% | 446 | 0.84% | 17 | 0.11% | 160 | 0.30% |
| Stooping | 20 | 0.26% | 1 | 0.01% | 212 | 1.05% | NA | NA | 1364 | 8.73% | 166 | 0.31% |
| Telephone | 377 | 4.97% | 1 | 0.01% | 81 | 0.40% | NA | NA | NA | NA | 167 | 0.31% |
| Toilet | 13 | 0.17% | 1 | 0.01% | 67 | 0.33% | 218 | 0.41% | 116 | 0.74% | 167 | 0.31% |
| Urine_incontinence | 14 | 0.18% | 1170 | 15.42% | 57 | 0.28% | 150 | 0.28% | NA | NA | NA | NA |
| Verbal_fluency | NA | NA | 410 | 5.40% | NA | NA | NA | NA | 1261 | 8.07% | 1470 | 2.76% |
| Walking_100m | 27 | 0.36% | NA | NA | NA | NA | NA | NA | 1321 | 8.45% | 166 | 0.31% |
| Walking_1km | 33 | 0.43% | NA | NA | 169 | 0.84% | NA | NA | 1350 | 8.64% | NA | NA |
| Wealth_Raw | 2914 | 38.41% | 131 | 1.73% | 0 | 0.00% | 24 | 0.05% | 19 | 0.12% | 140 | 0.26% |

*Note: NA indicates that data is unavailable in the GAD coordinated dataset, possibly due to planning missing or changes in the follow-up questionnaire.*

###### Meta-regression results and model coefficients


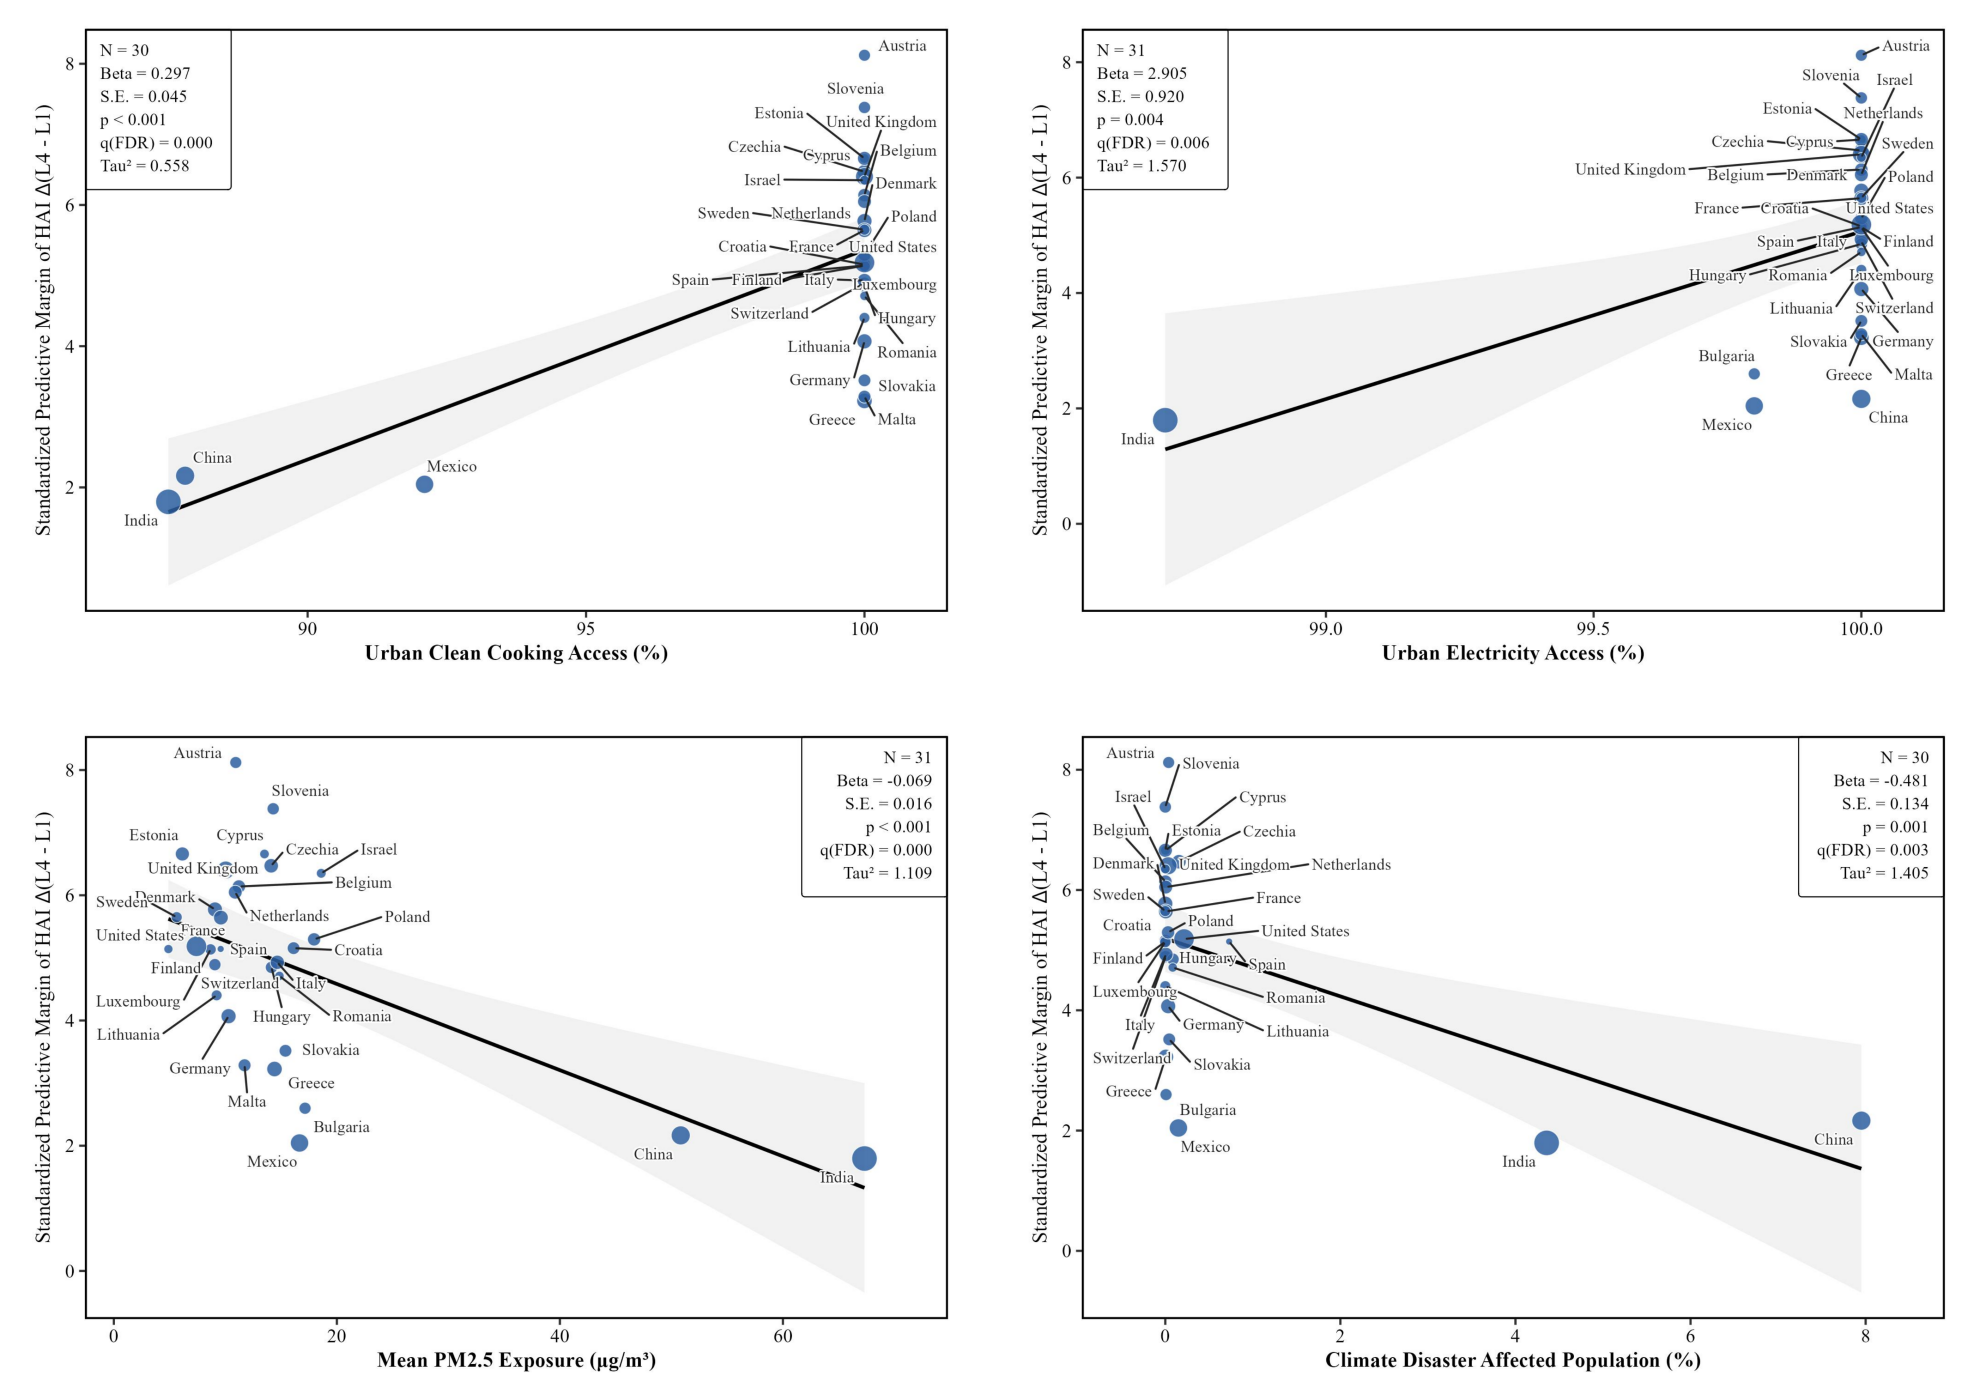

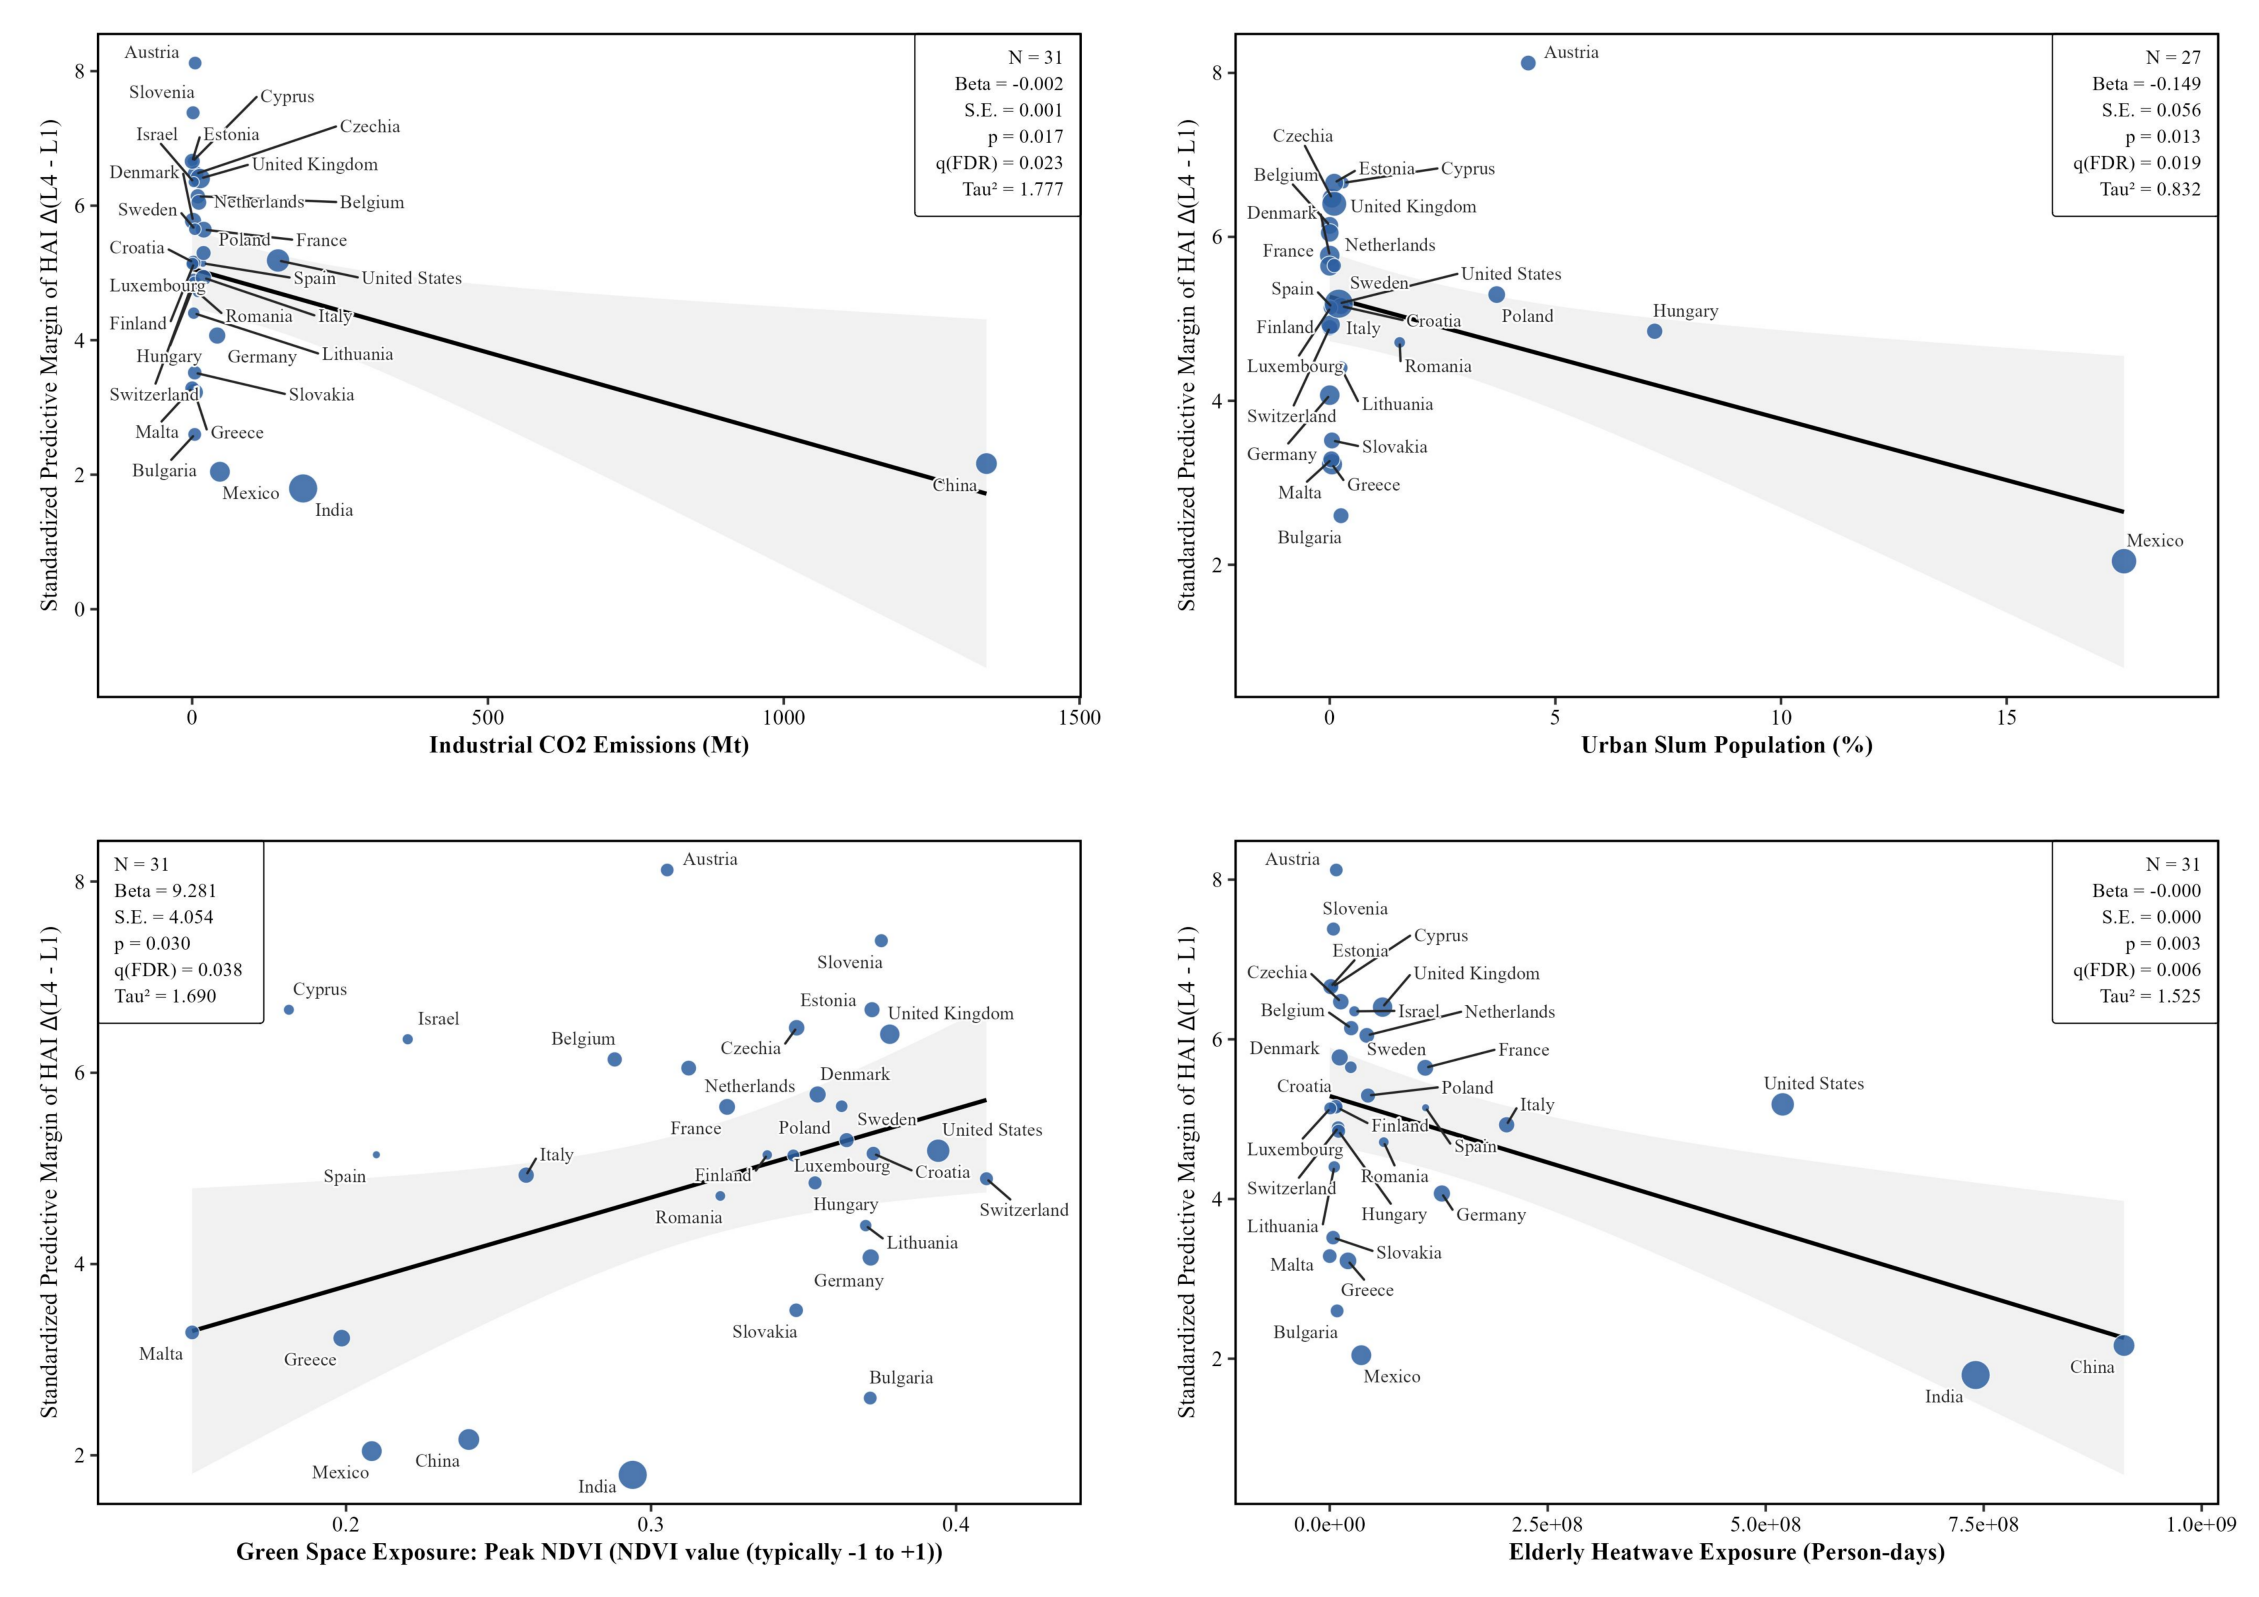

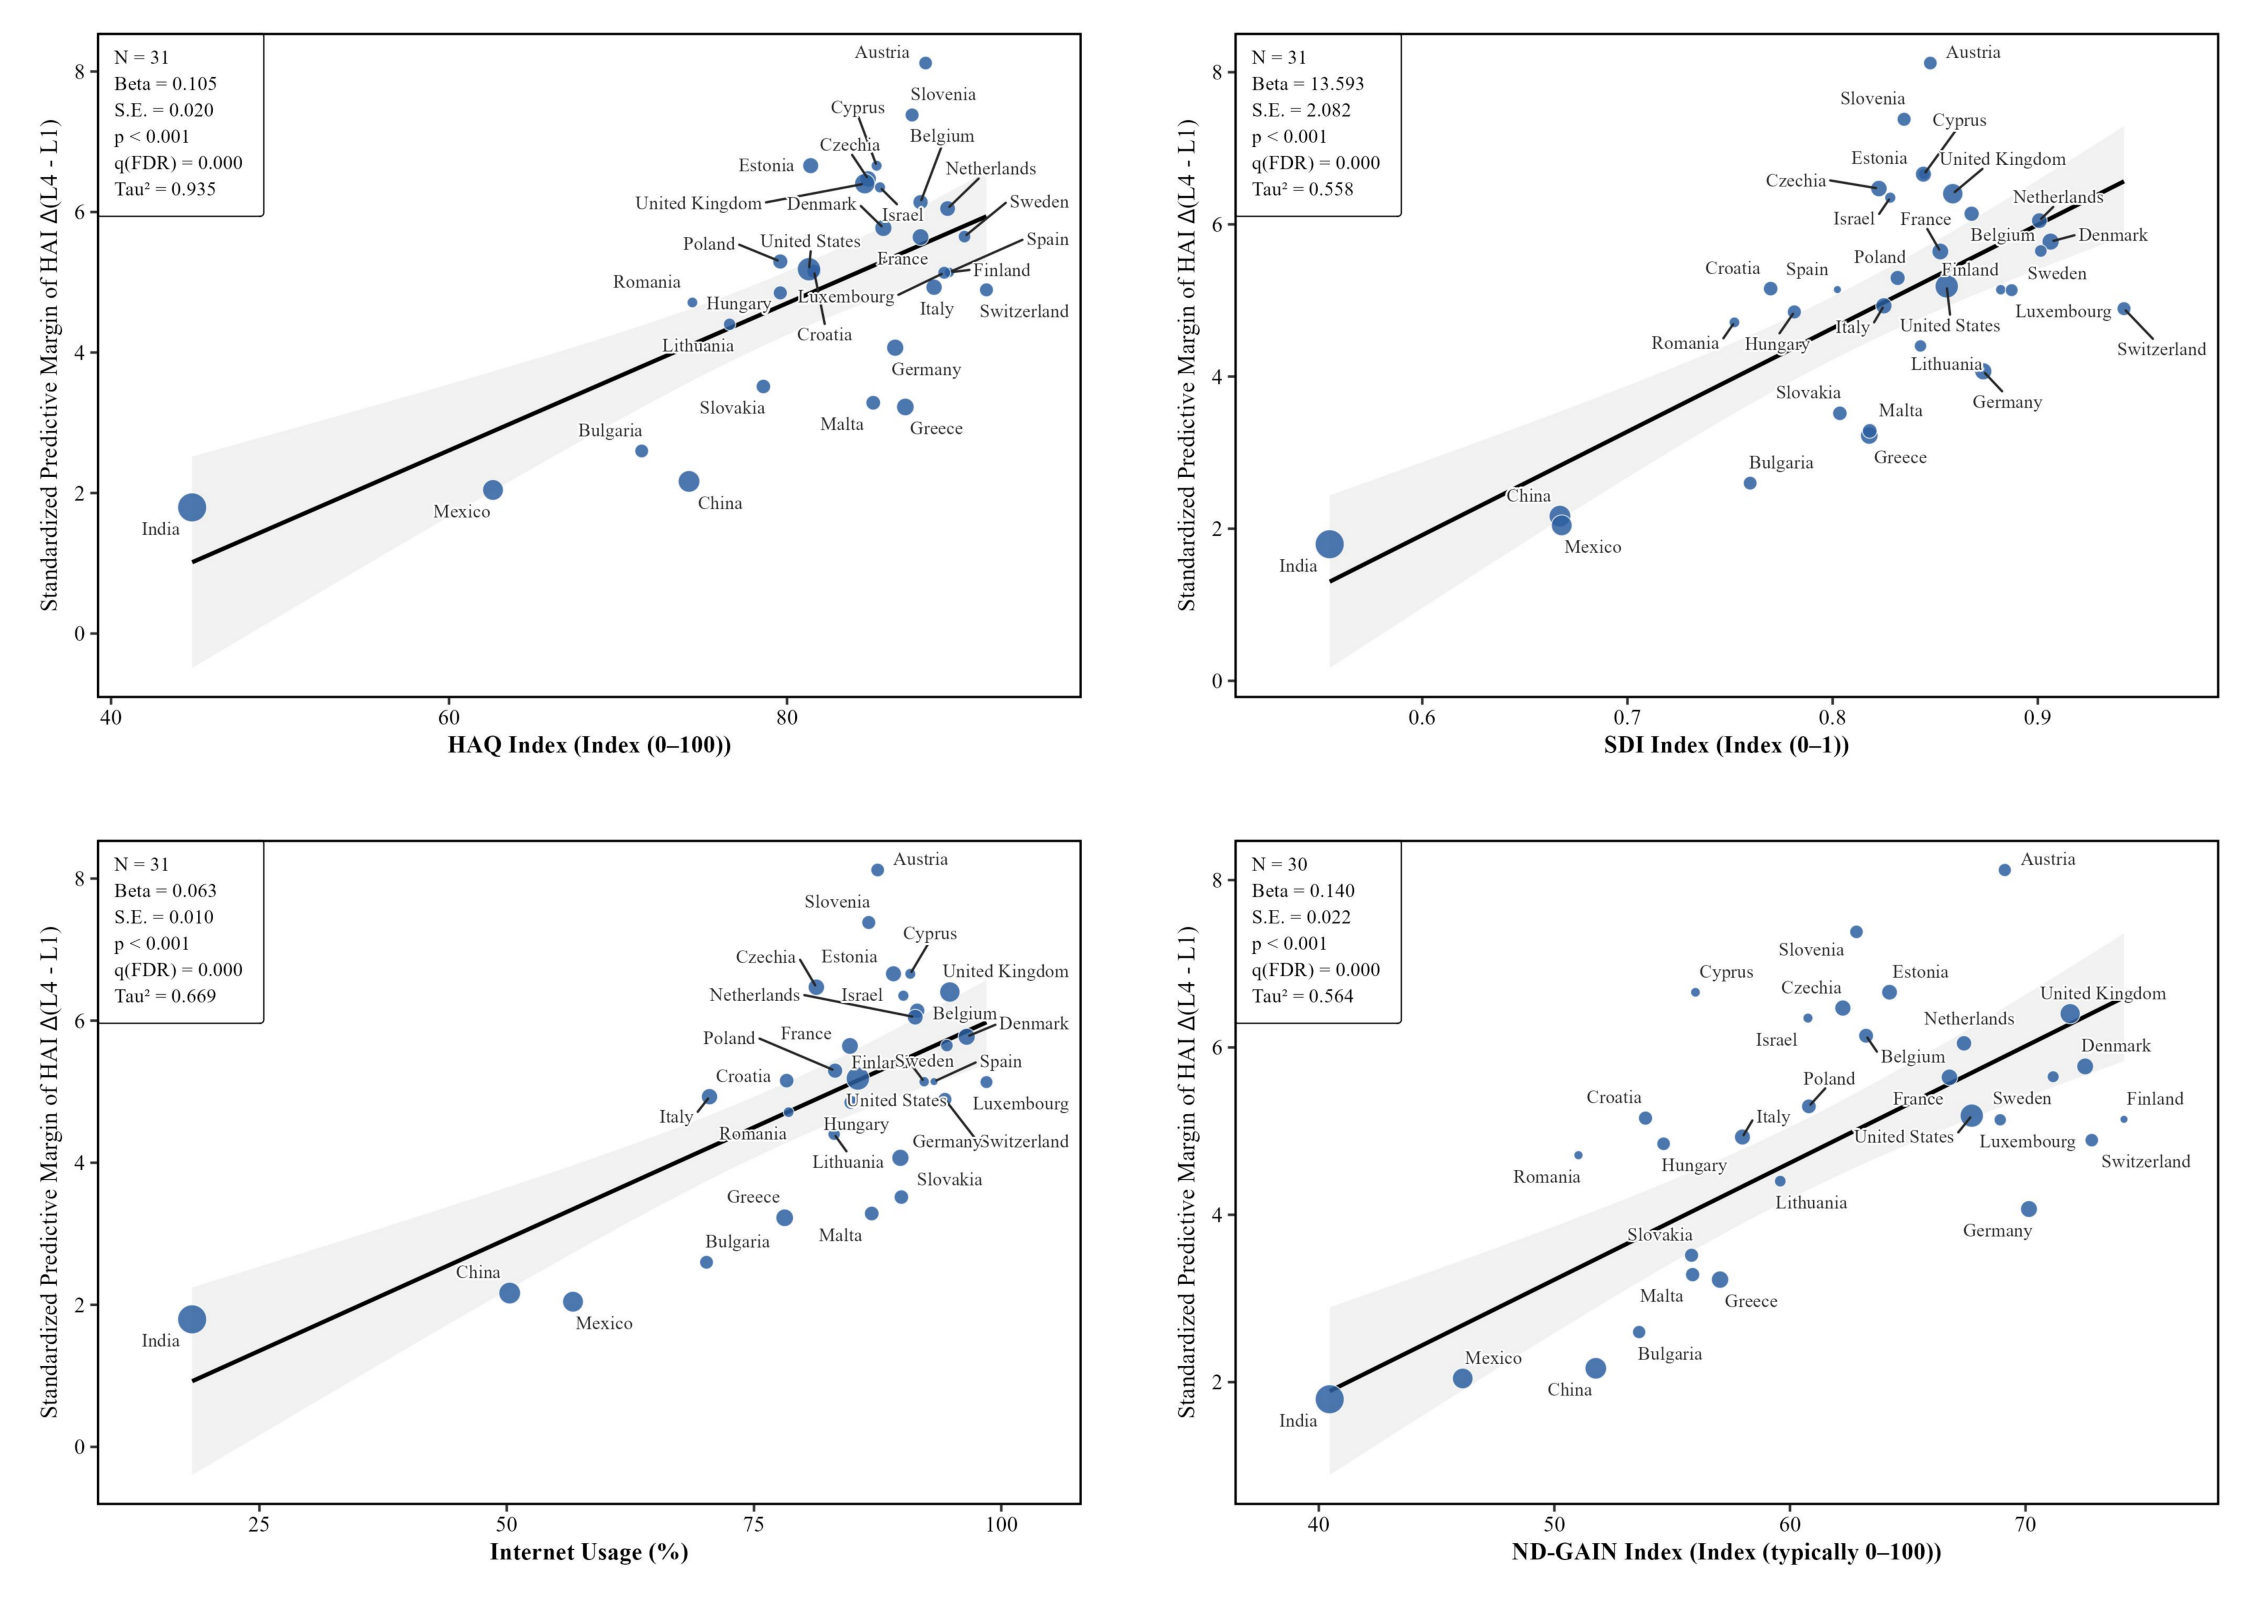

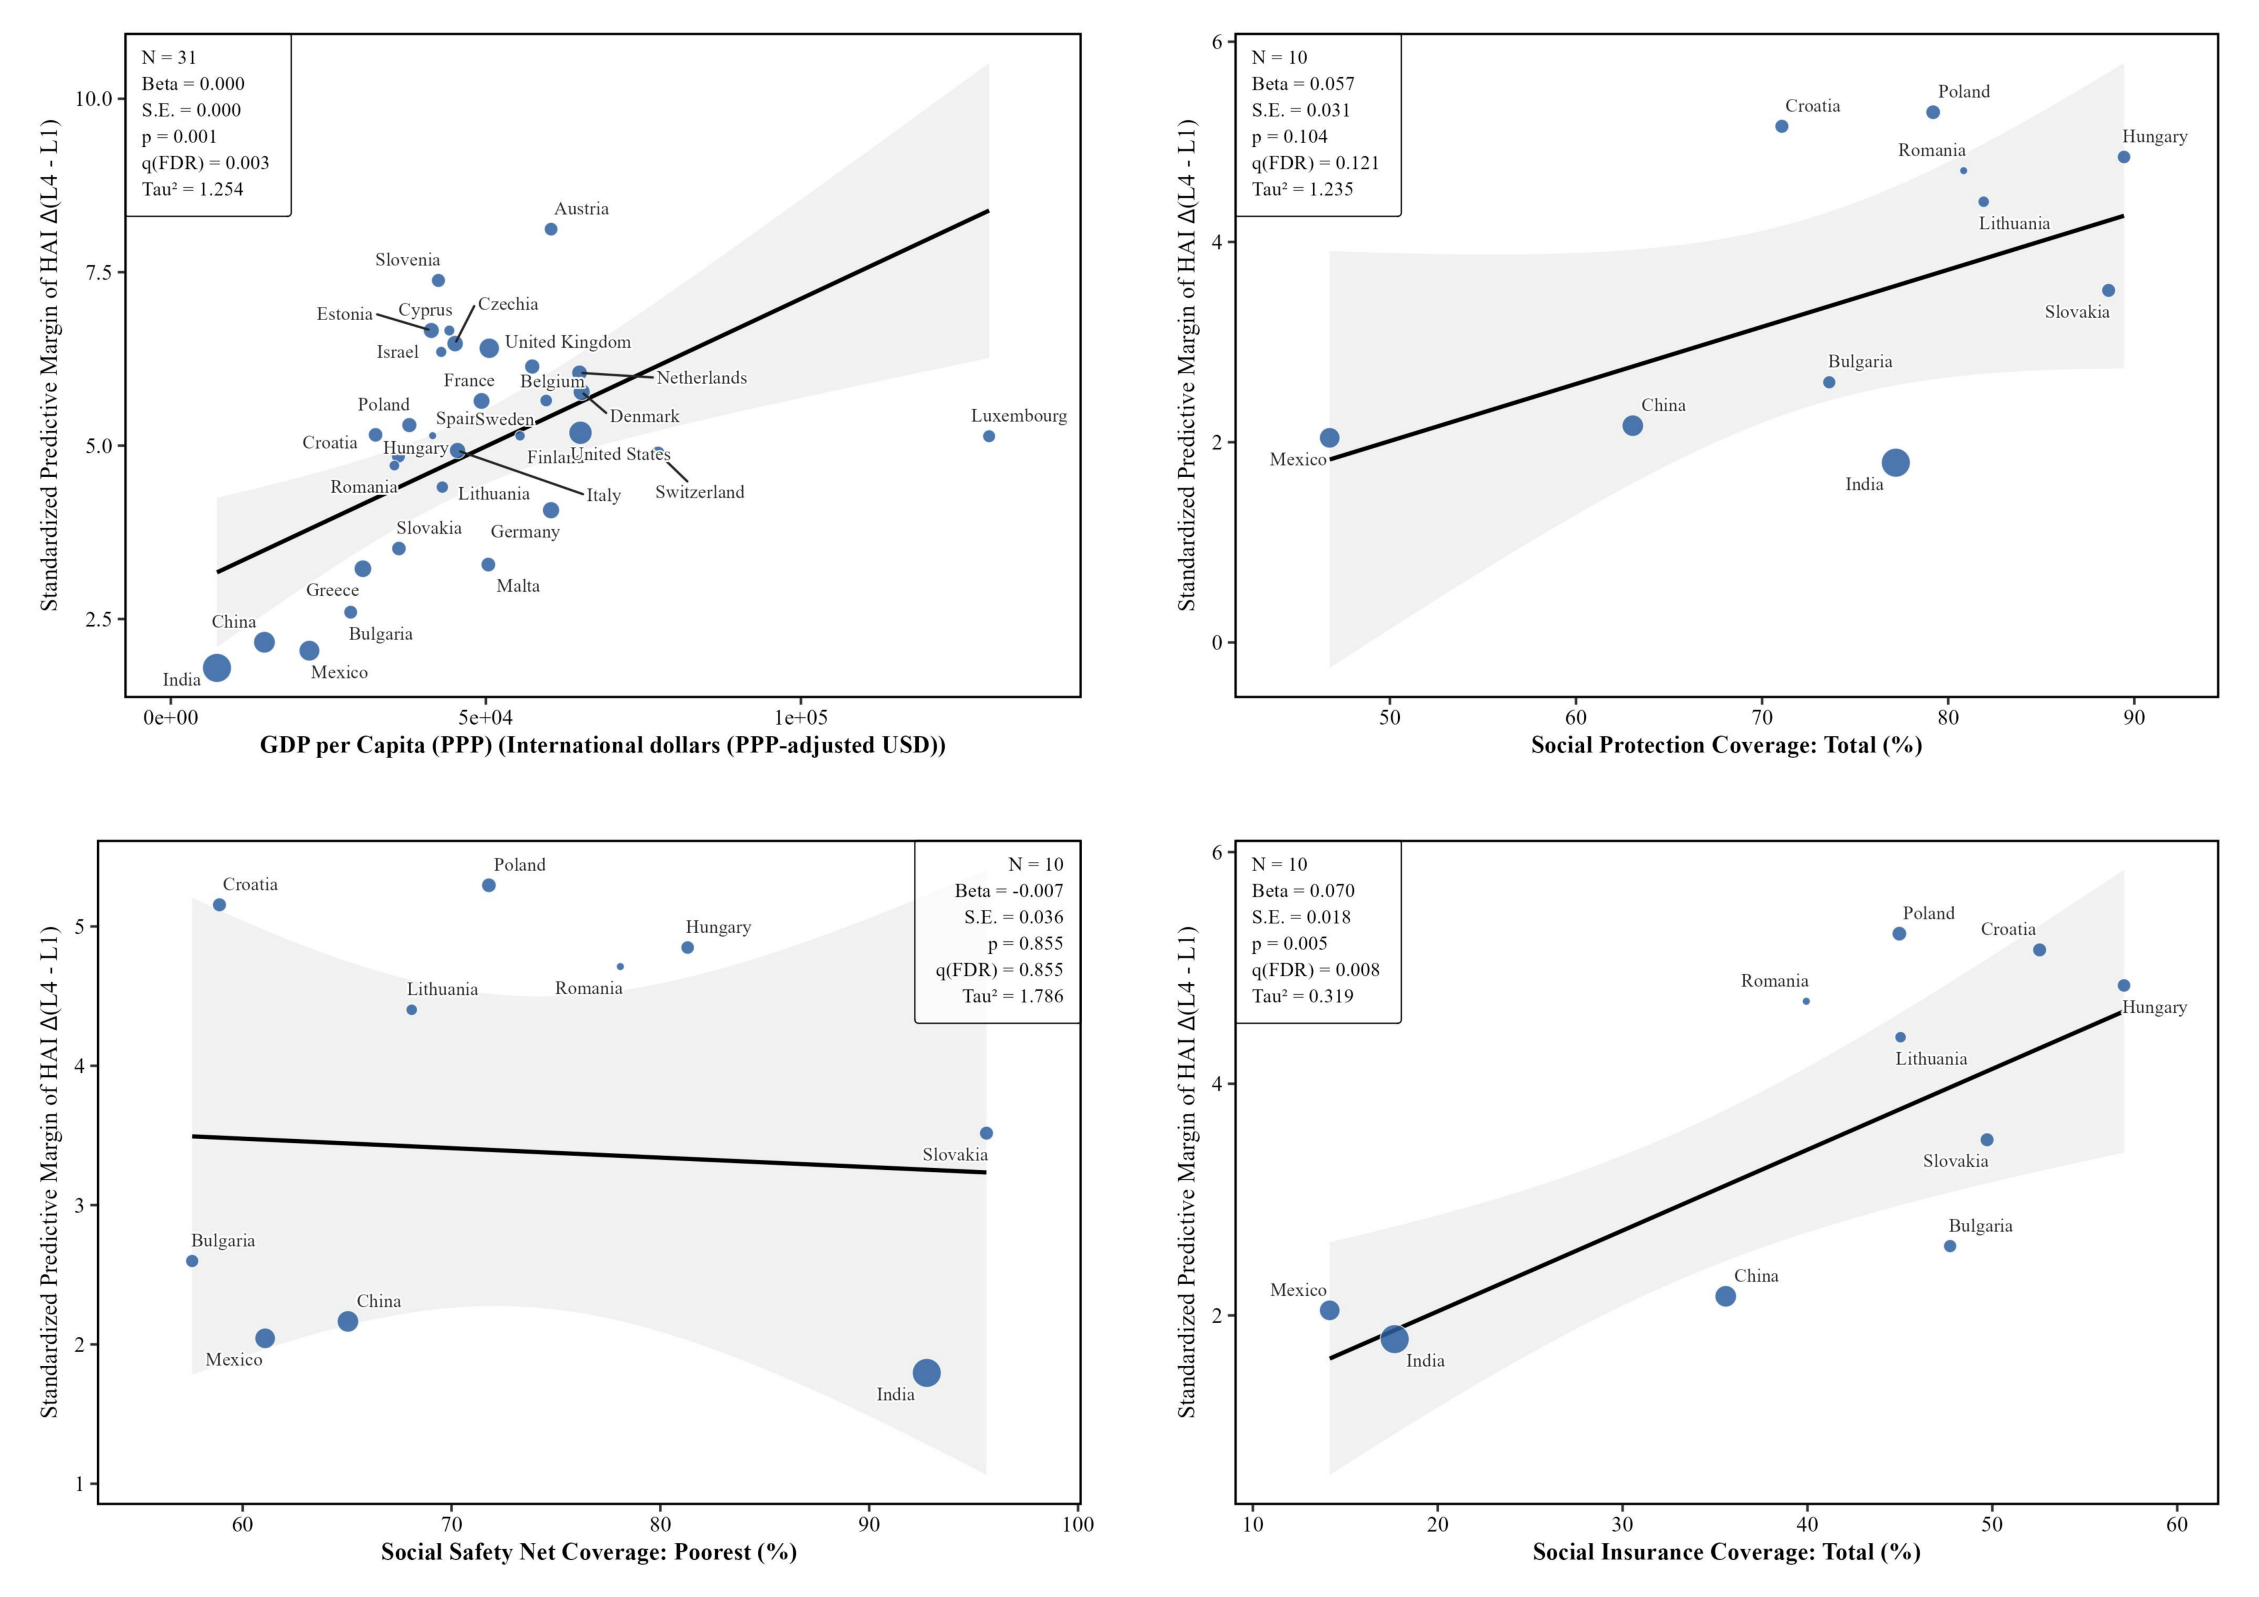

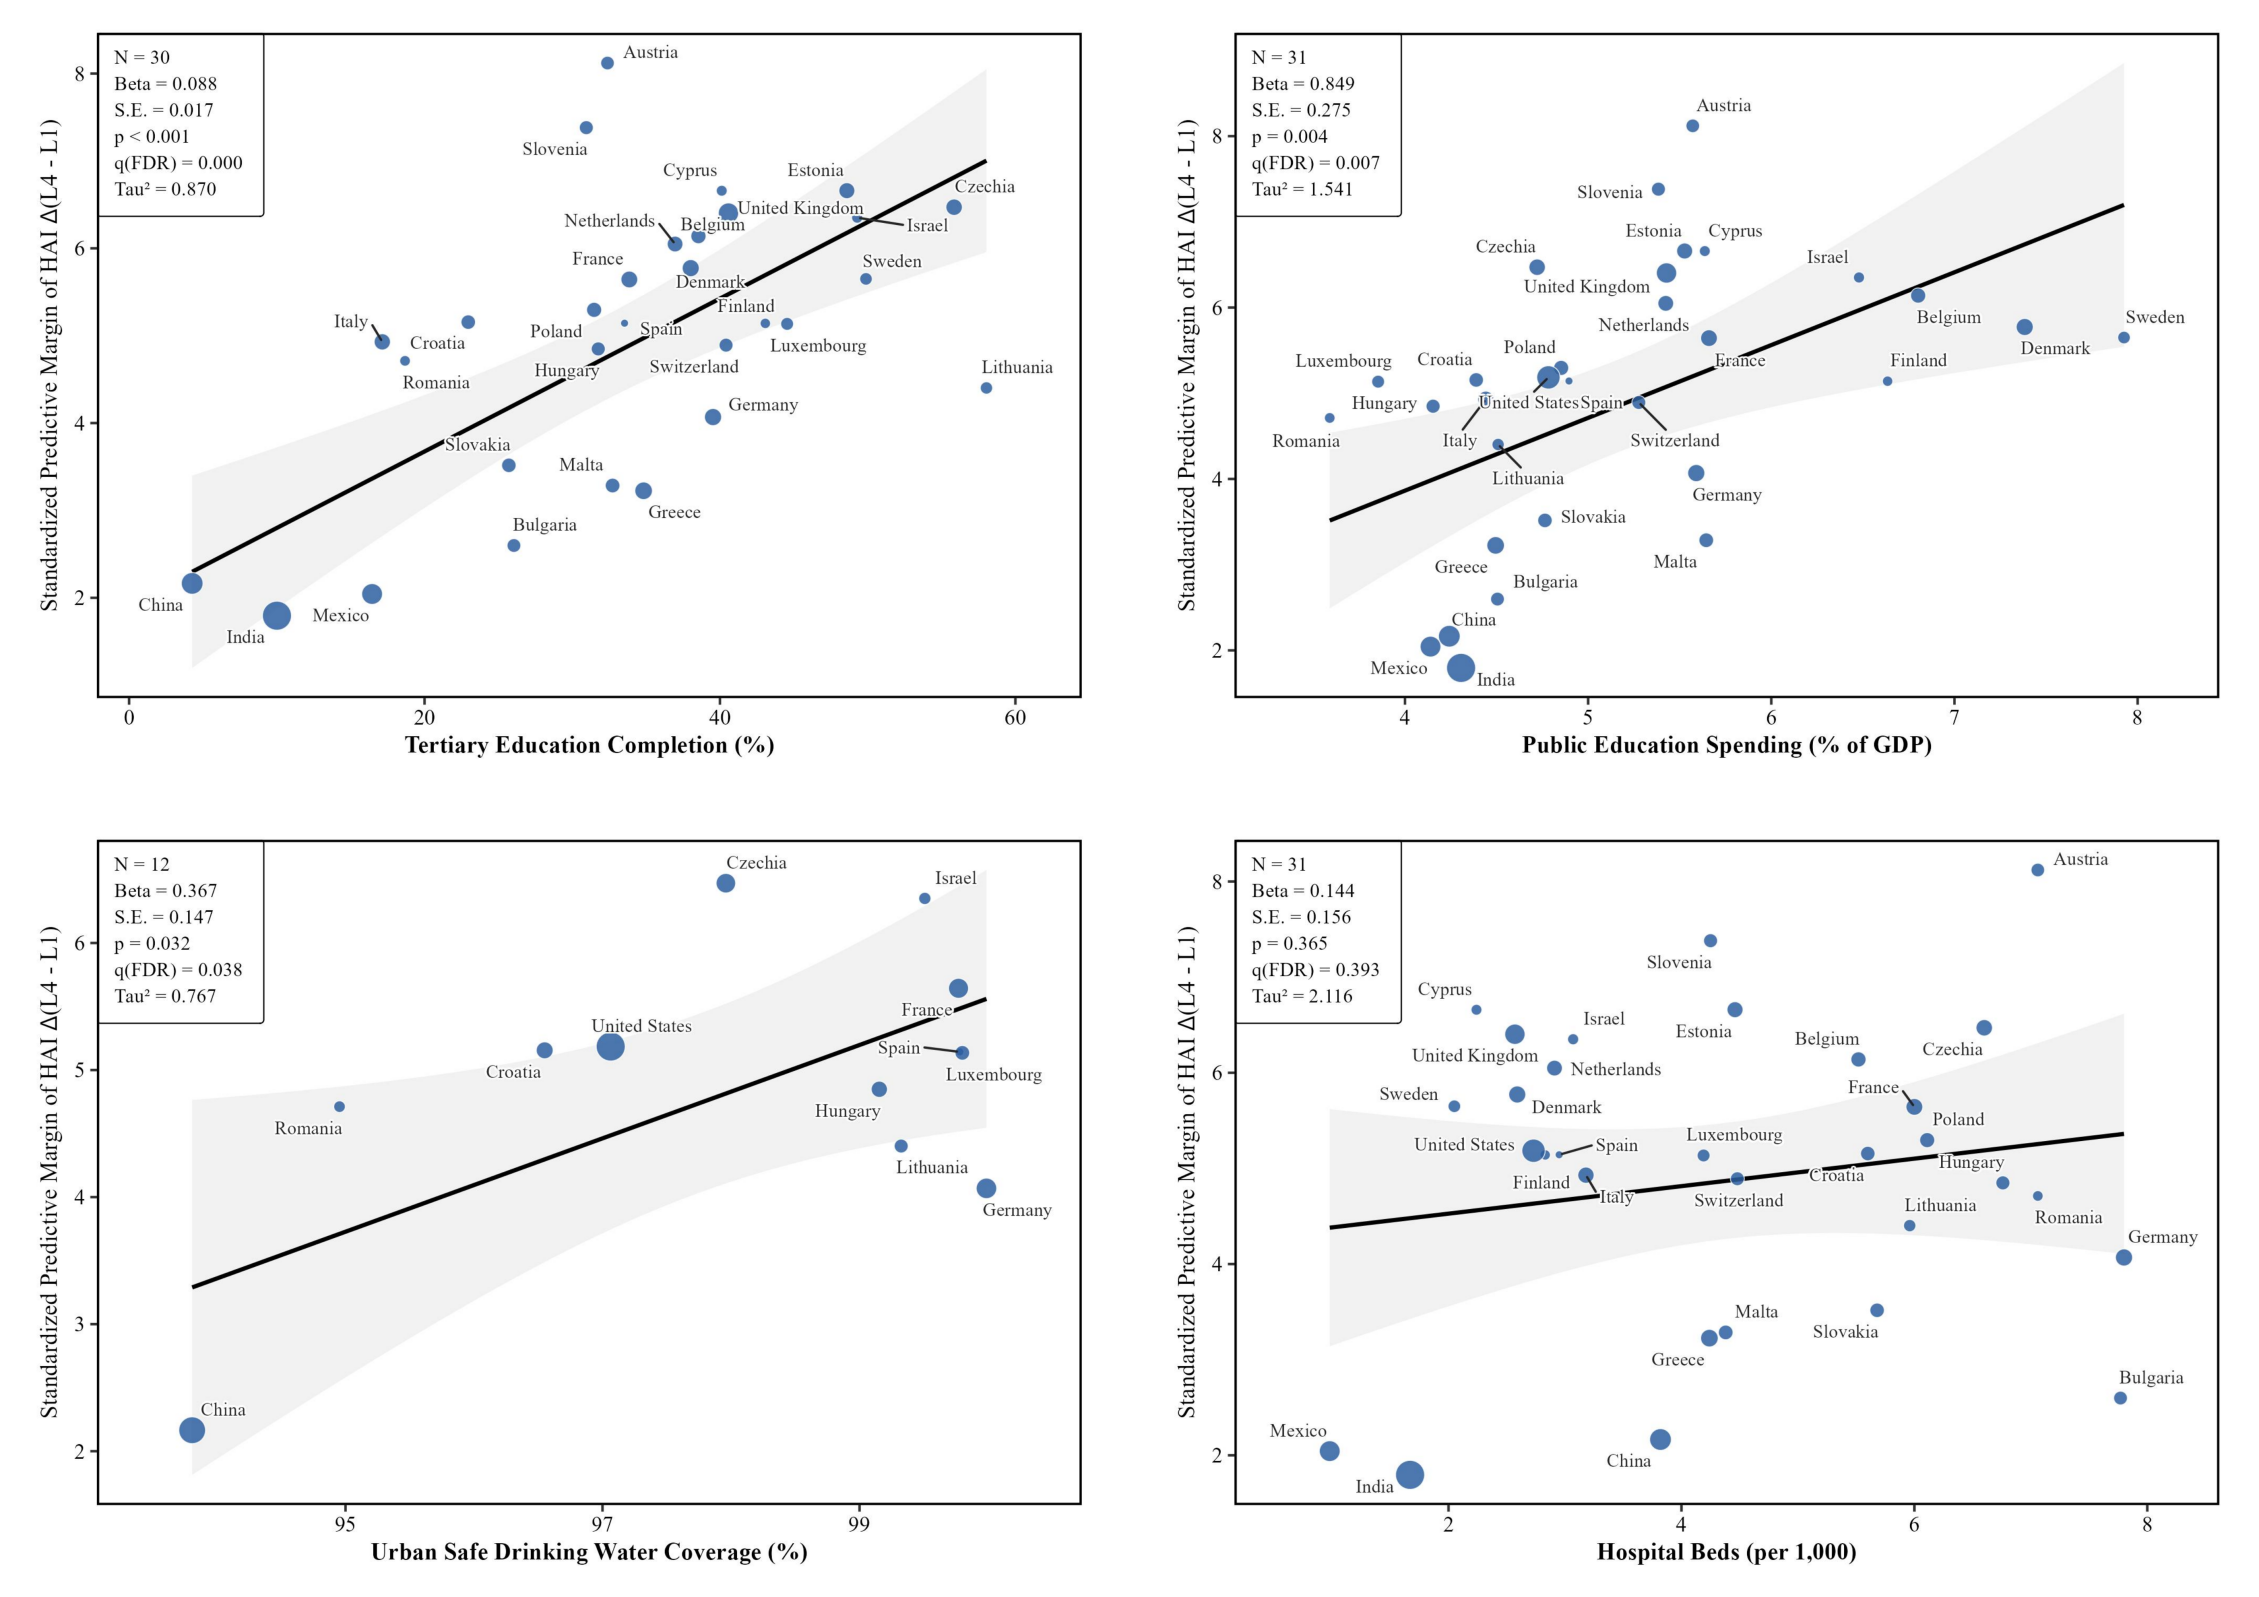

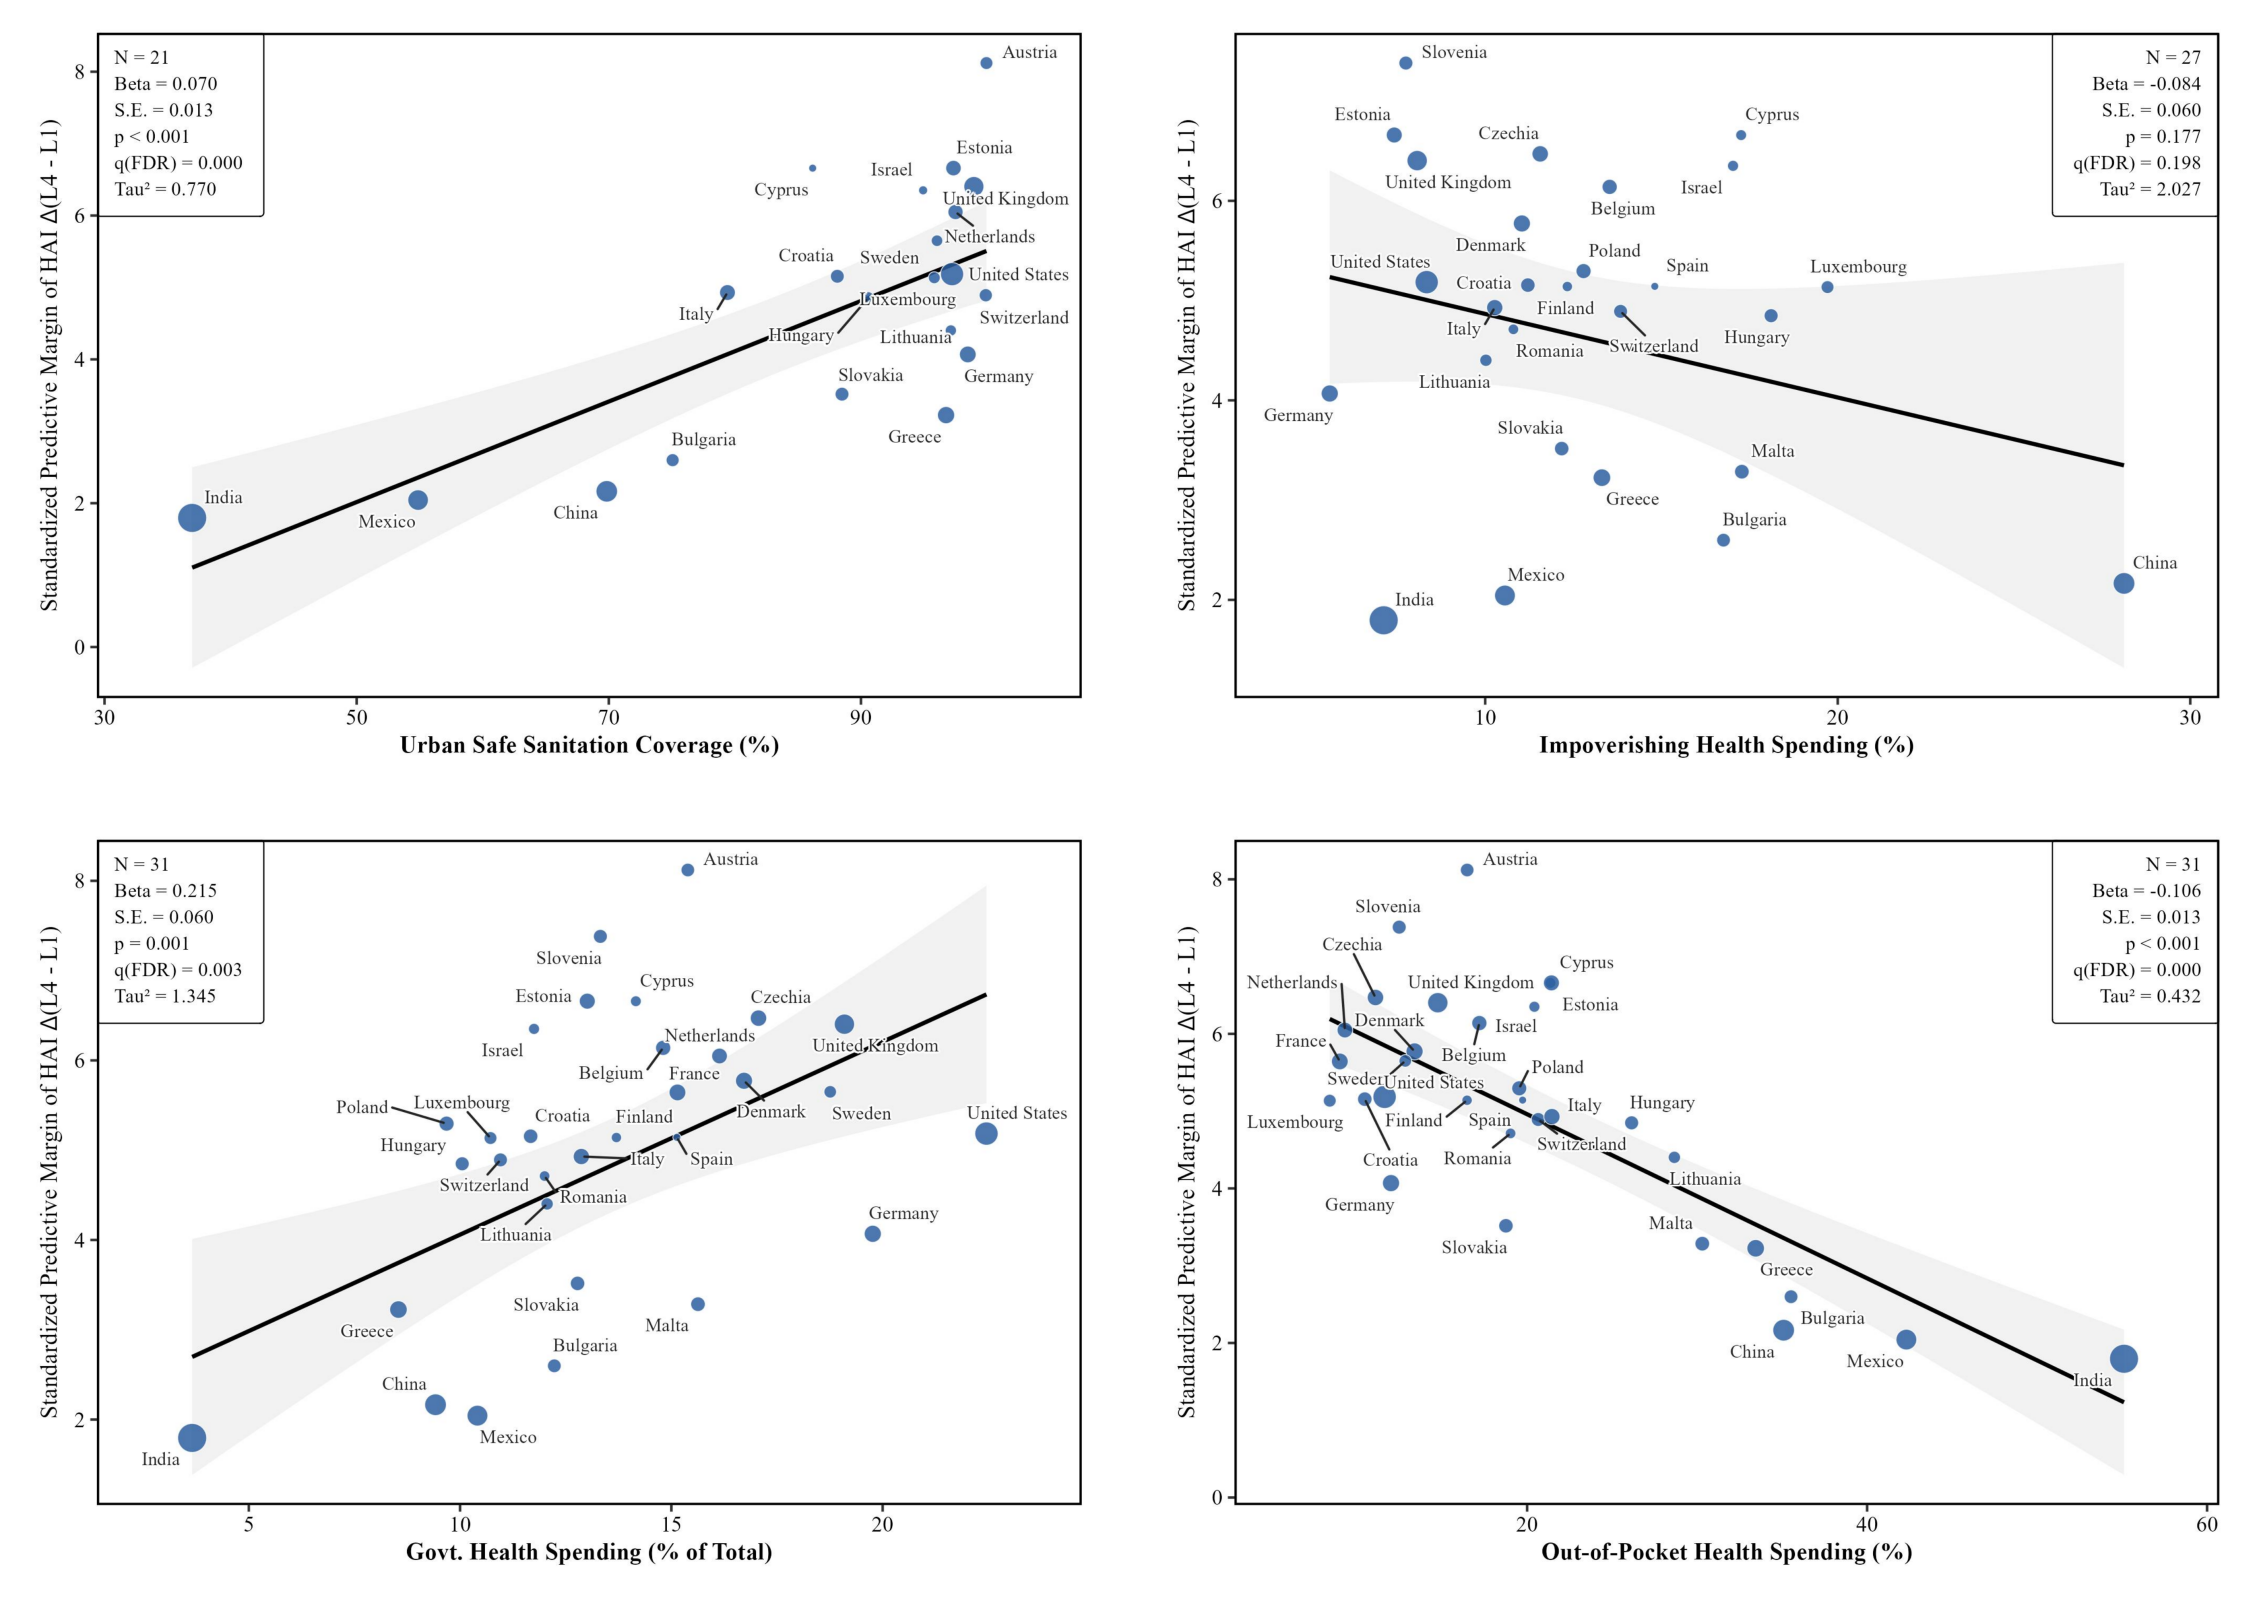

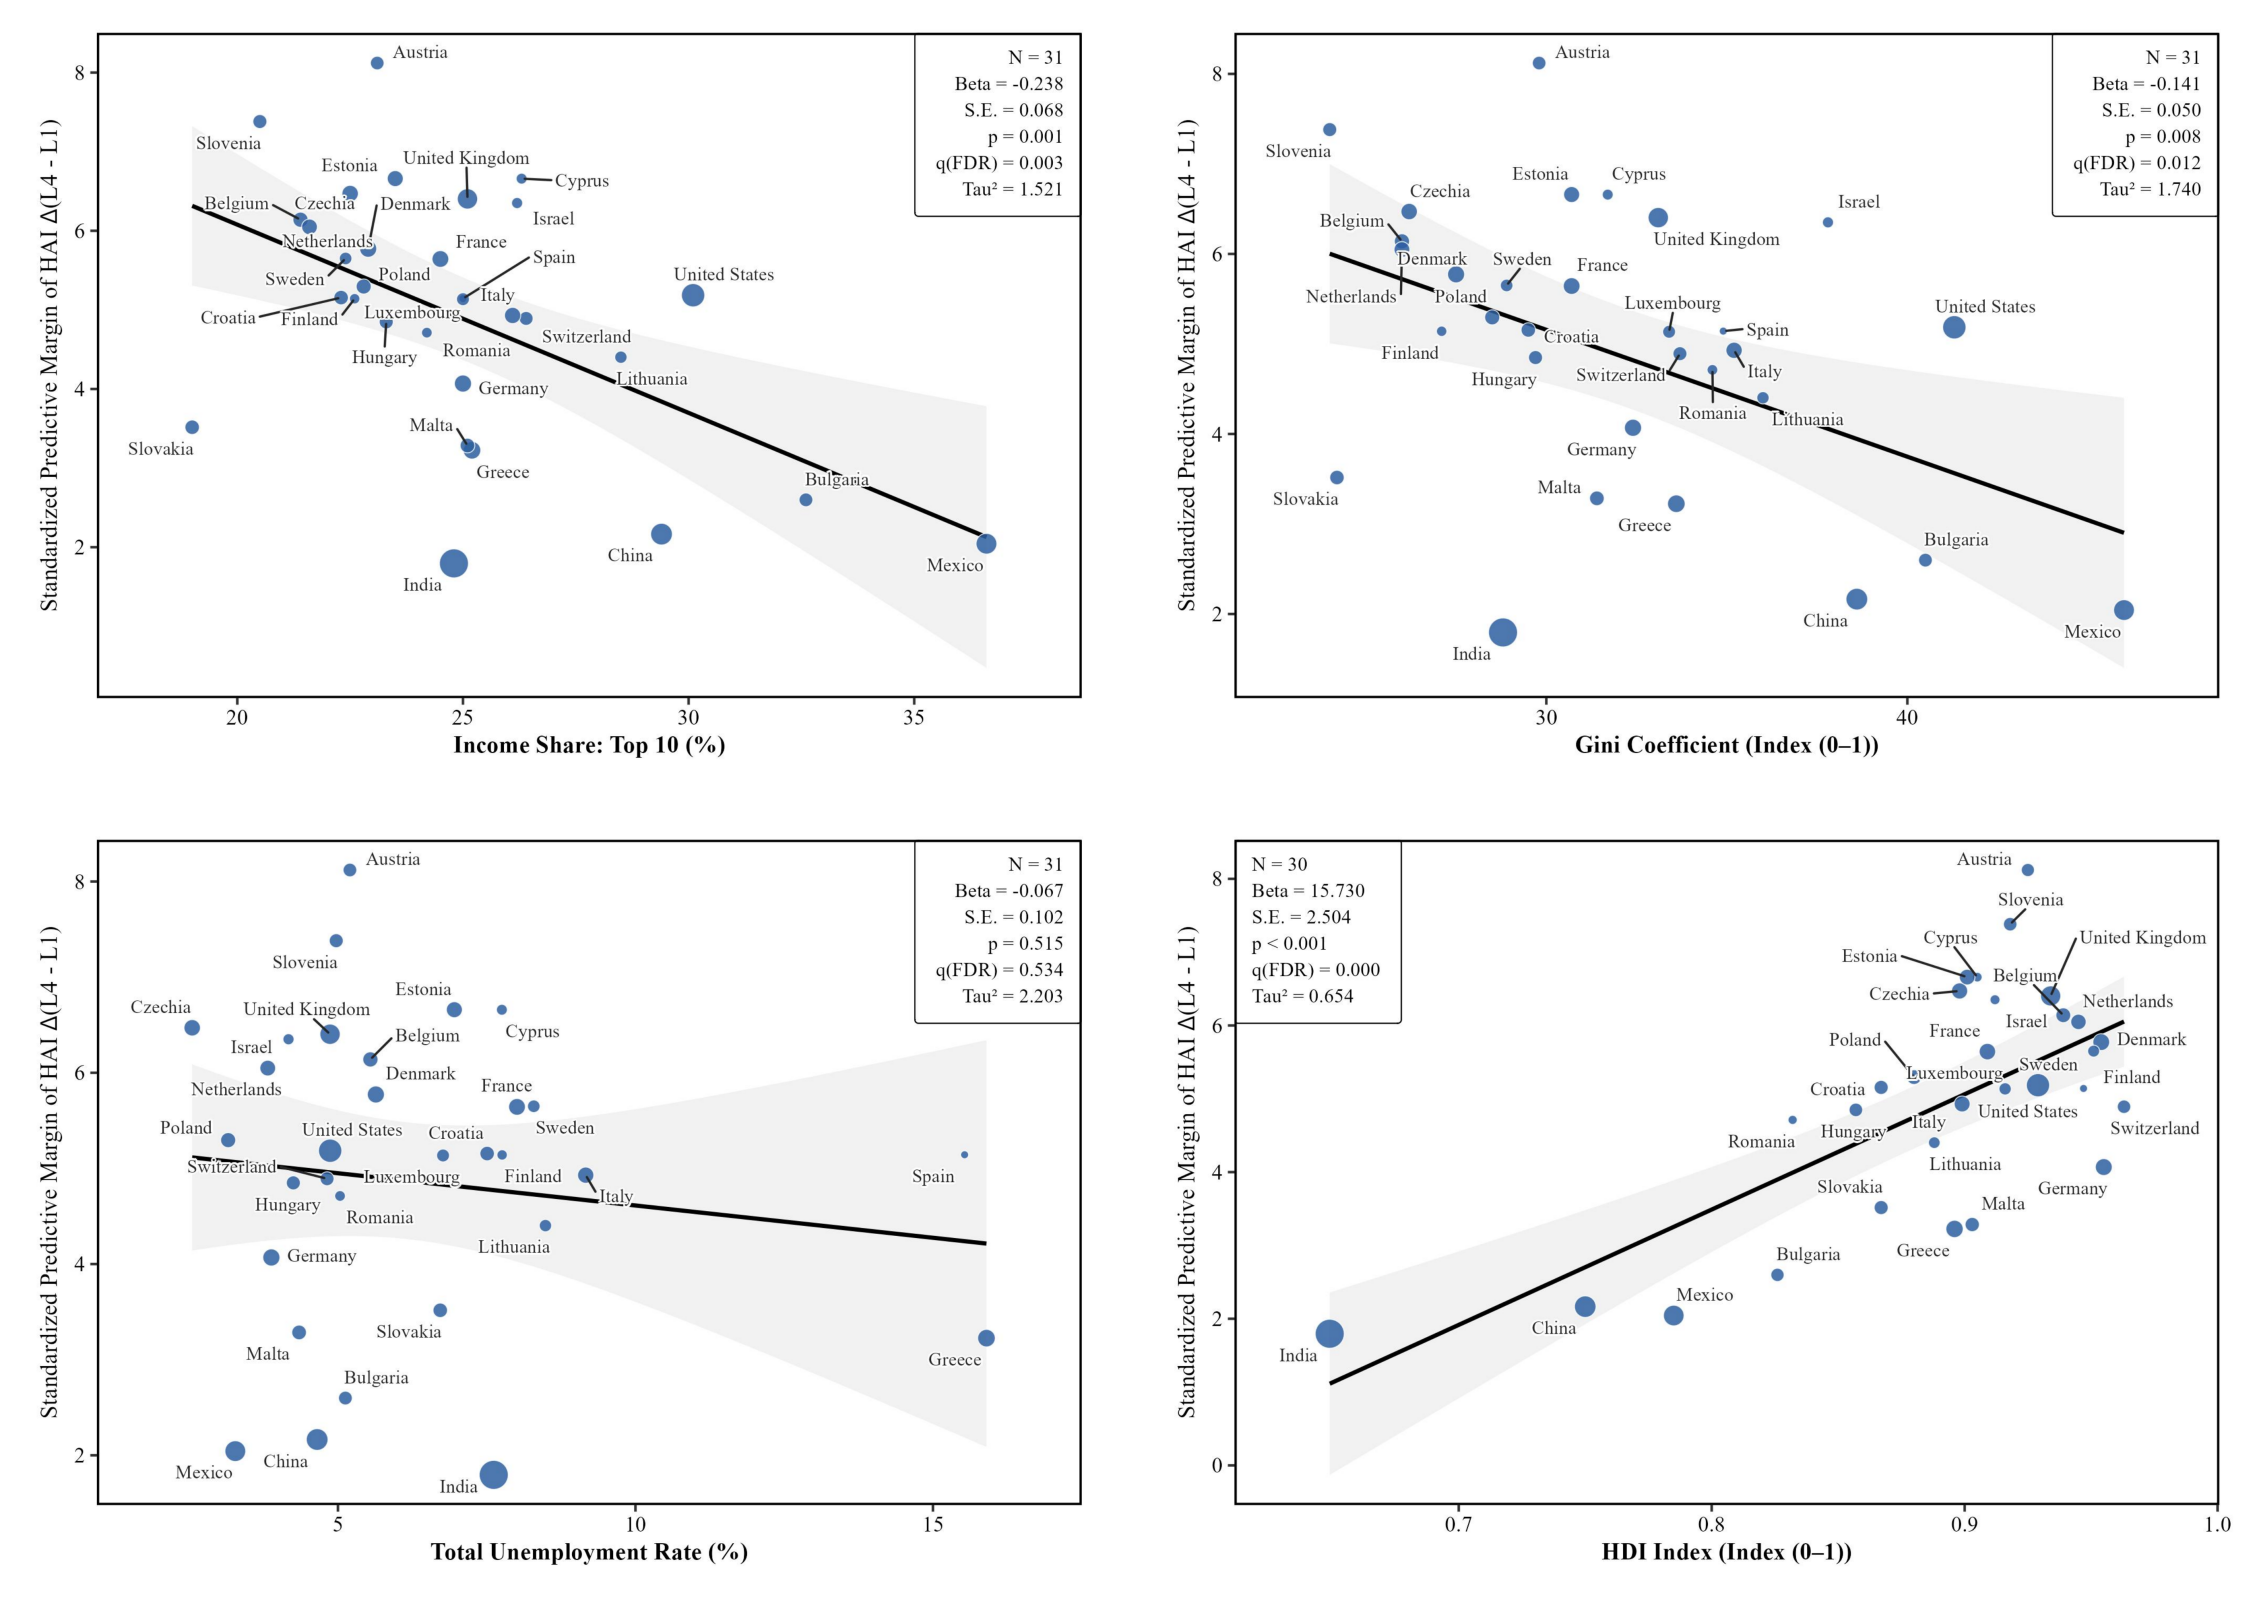


*Blue bubbles represent countries, and the size of the bubble represents the weight of that country in the meta-regression (inversely proportional to the SE). The solid black line represents the fitted line of the meta-regression, and the light gray shading represents the 95% confidence interval of the fitted line. Tau²(τ2) represents the unexplained variance among the effect sizes of different countries after this indicator is included as an explanatory variable.*

###### Standardized marginal means of eHAYs (primary longitudinal outcome)

| **Country** | **HLS Level 1** | **HLS Level 2** | **HLS Level 3** | **HLS Level 4** | **Δ[L4–L1]** |
| --- | --- | --- | --- | --- | --- |
| Austria | 270.8 (266.9–274.7) | 279.5 (277.0–282.1) | 287.0 (284.3–289.8) | 292.4 (288.2–296.7) | 21.61 (15.82–27.39) |
| Belgium | 268.6 (265.4–271.8) | 278.1 (275.9–280.2) | 285.8 (283.3–288.4) | 293.1 (288.6–297.6) | 24.45 (18.94–29.95) |
| China | 247.8 (244.2–251.3) | 252.7 (250.3–255.1) | 256.0 (253.8–258.2) | 260.3 (257.9–262.6) | 12.5 (8.23–16.78) |
| Czechia | 274.2 (270.7–277.7) | 277.8 (275.5–280.2) | 285.8 (283.4–288.2) | 291.3 (286.1–296.6) | 17.16 (10.83–23.48) |
| Denmark | 275.9 (271.2–280.6) | 287.3 (284.0–290.5) | 290.0 (286.1–293.8) | 295.1 (287.7–302.5) | 19.21 (10.47–27.94) |
| Estonia | 251.9 (248.3–255.5) | 264.4 (262.7–266.2) | 276.7 (275.0–278.5) | 287.2 (284.0–290.4) | 35.28 (30.48–40.09) |
| France | 273.8 (270.4–277.2) | 276.8 (274.4–279.1) | 286.8 (284.4–289.2) | 292.2 (288.2–296.3) | 18.42 (13.13–23.70) |
| Germany | 269.9 (261.9–277.9) | 281.3 (275.6–286.9) | 288.8 (283.6–294.0) | 295.5 (287.0–303.9) | 25.56 (13.91–37.22) |
| Hungary | 254.9 (248.5–261.3) | 267.3 (263.9–270.7) | 278.8 (275.1–282.4) | 287.6 (280.1–295.0) | 32.71 (22.88–42.55) |
| Italy | 273.5 (269.3–277.8) | 278.6 (275.8–281.5) | 283.9 (280.7–287.1) | 296.5 (291.1–301.9) | 22.99 (16.12–29.86) |
| Mexico | 258.7 (255.9–261.4) | 262.8 (260.7–264.9) | 264.9 (262.7–267.0) | 273.4 (270.1–276.7) | 14.78 (10.47–19.10) |
| Poland | 262.5 (257.0–268.0) | 272.8 (269.8–275.8) | 276.8 (272.9–280.7) | 290.2 (280.5–299.8) | 27.68 (16.59–38.78) |
| Portugal | 267.8 (261.2–274.4) | 270.0 (264.2–275.8) | 280.2 (274.7–285.7) | 282.3 (272.5–292.0) | 14.47 (2.69–26.24) |
| Slovenia | 263.4 (256.9–269.8) | 274.2 (271.3–277.2) | 285.2 (282.3–288.1) | 290.4 (285.4–295.5) | 27.05 (18.83–35.26) |
| Spain | 267.1 (262.2–272.0) | 270.0 (266.3–273.6) | 280.2 (276.3–284.0) | 289.9 (284.3–295.6) | 22.81 (15.33–30.30) |
| Sweden | 284.9 (278.2–291.5) | 290.9 (287.4–294.5) | 298.0 (294.3–301.8) | 310.5 (304.7–316.2) | 25.6 (16.86–34.33) |
| Switzerland | 291.3 (287.2–295.5) | 295.5 (292.8–298.1) | 298.1 (295.4–300.8) | 298.5 (293.7–303.4) | 7.22 (0.84–13.60) |
| United Kingdom | 277.5 (275.8–279.2) | 288.2 (287.0–289.5) | 292.9 (291.3–294.6) | 297.8 (294.3–301.2) | 20.25 (16.43–24.08) |
| United States | 251.3 (249.7–252.9) | 262.2 (261.1–263.4) | 269.7 (268.3–271.1) | 279.9 (277.4–282.5) | 28.64 (25.62–31.66) |

###### Sensitivity: robustness to latent-class assumptions for eHAYs


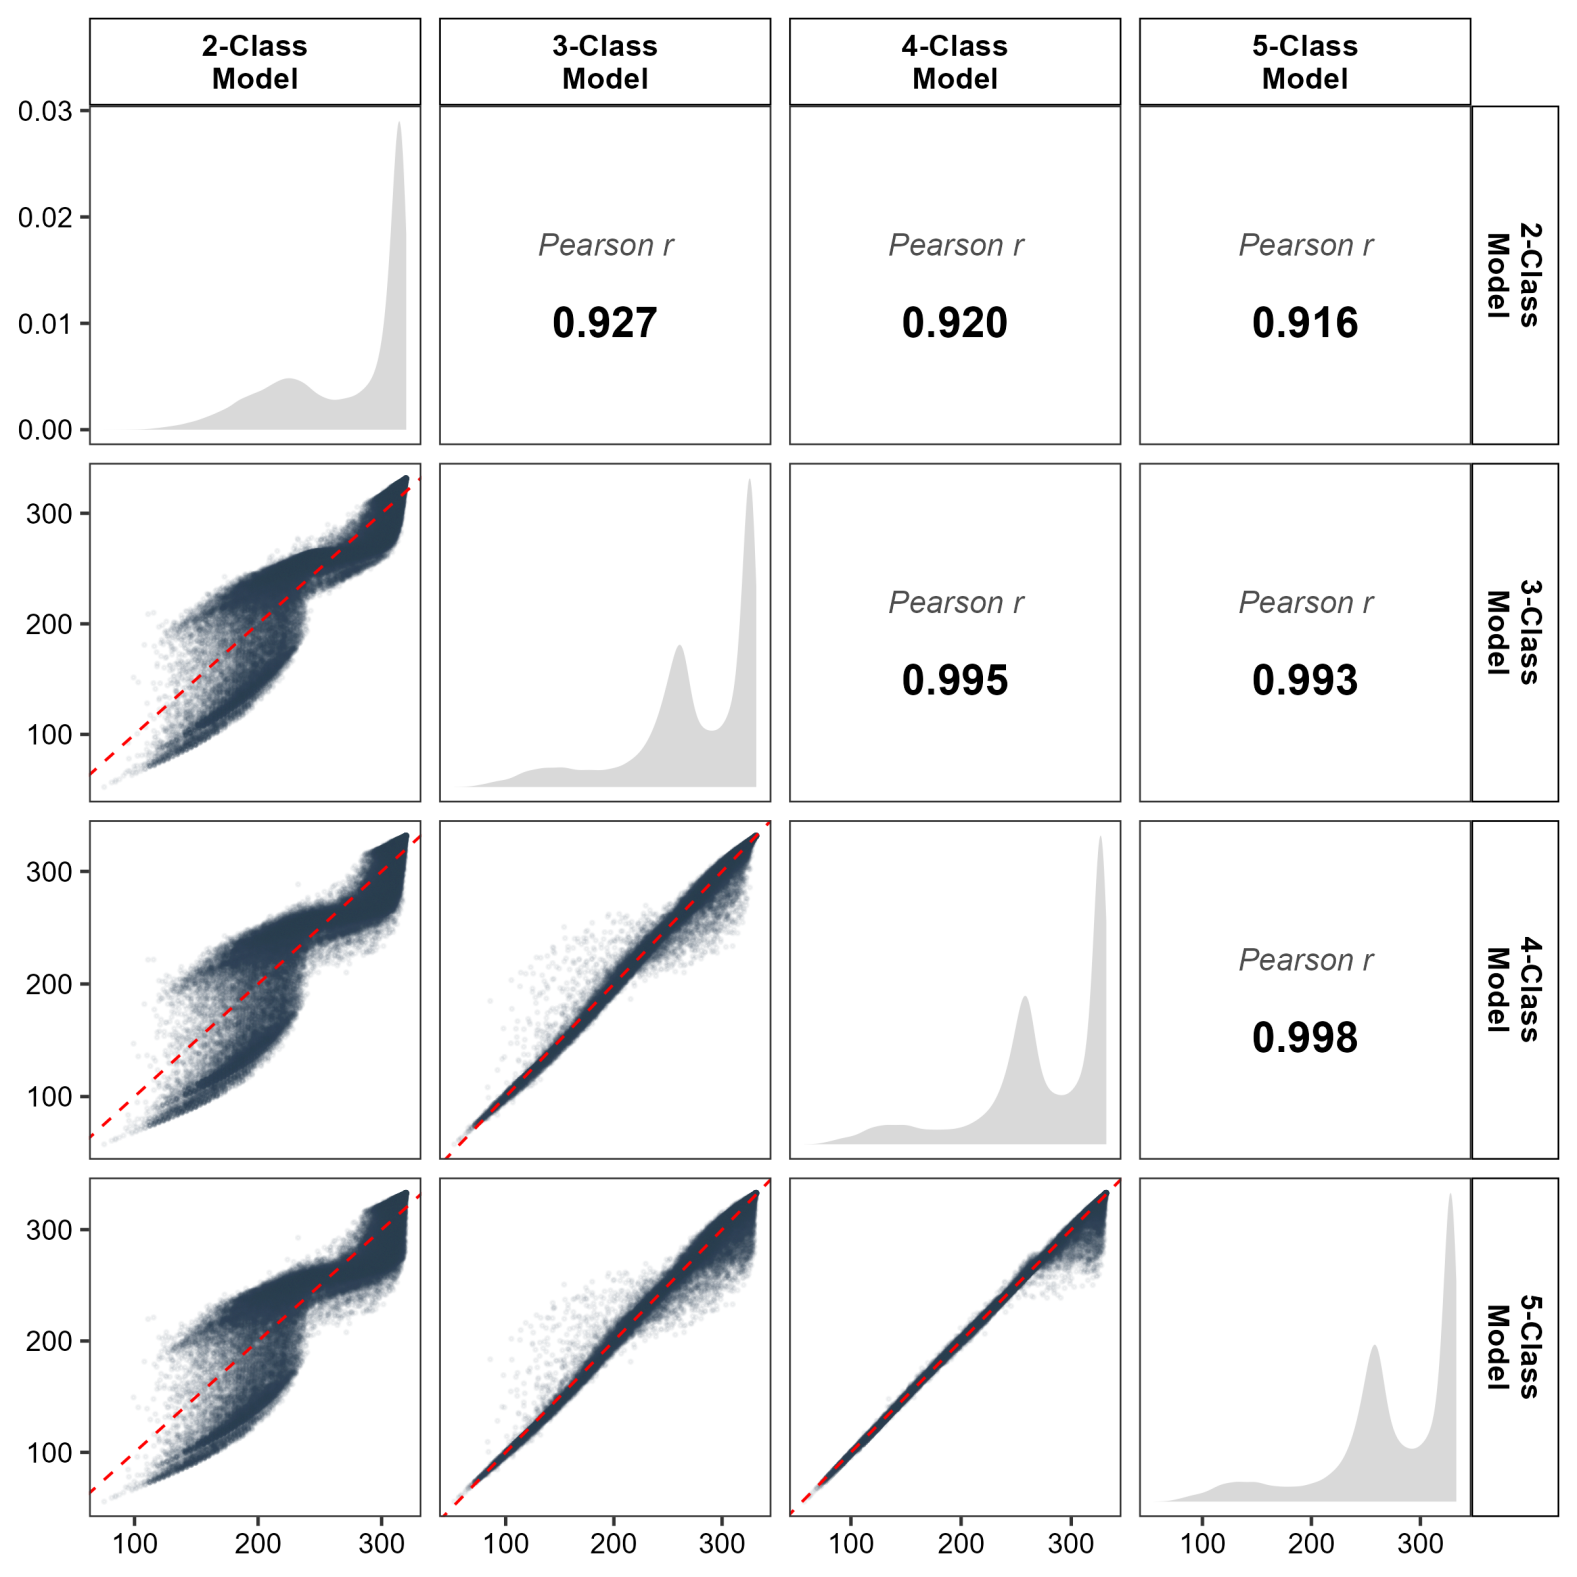


*Note: The diagonal panels display the density distribution of eHAYs for each respective model. The lower triangular panels present scatter plots of individual-level eHAYs between models; the red dashed line represents the identity line. The upper triangular panels show the corresponding Pearson correlation coefficients.*

###### Sensitivity: agreement between model-based eHAYs and raw-data integration


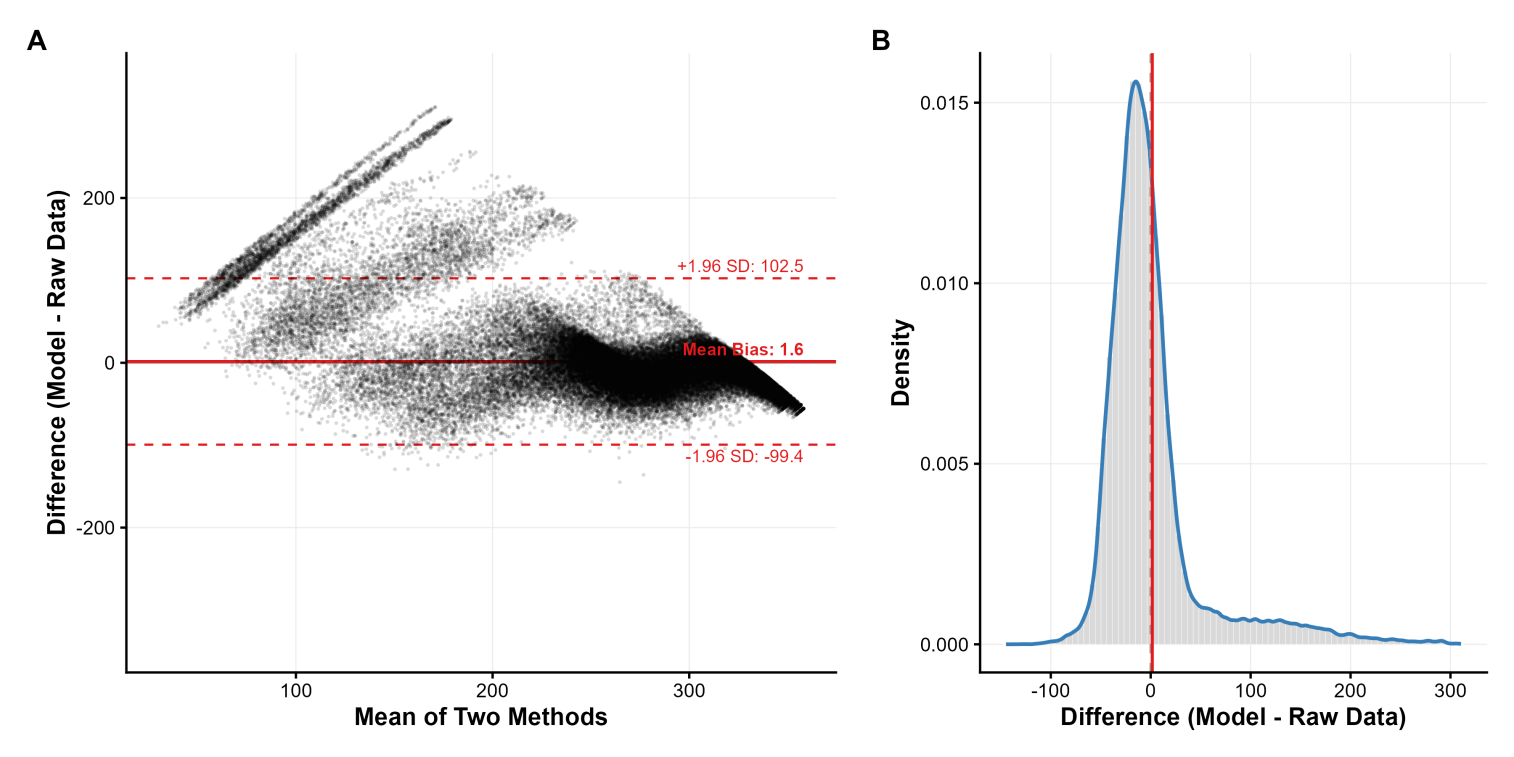


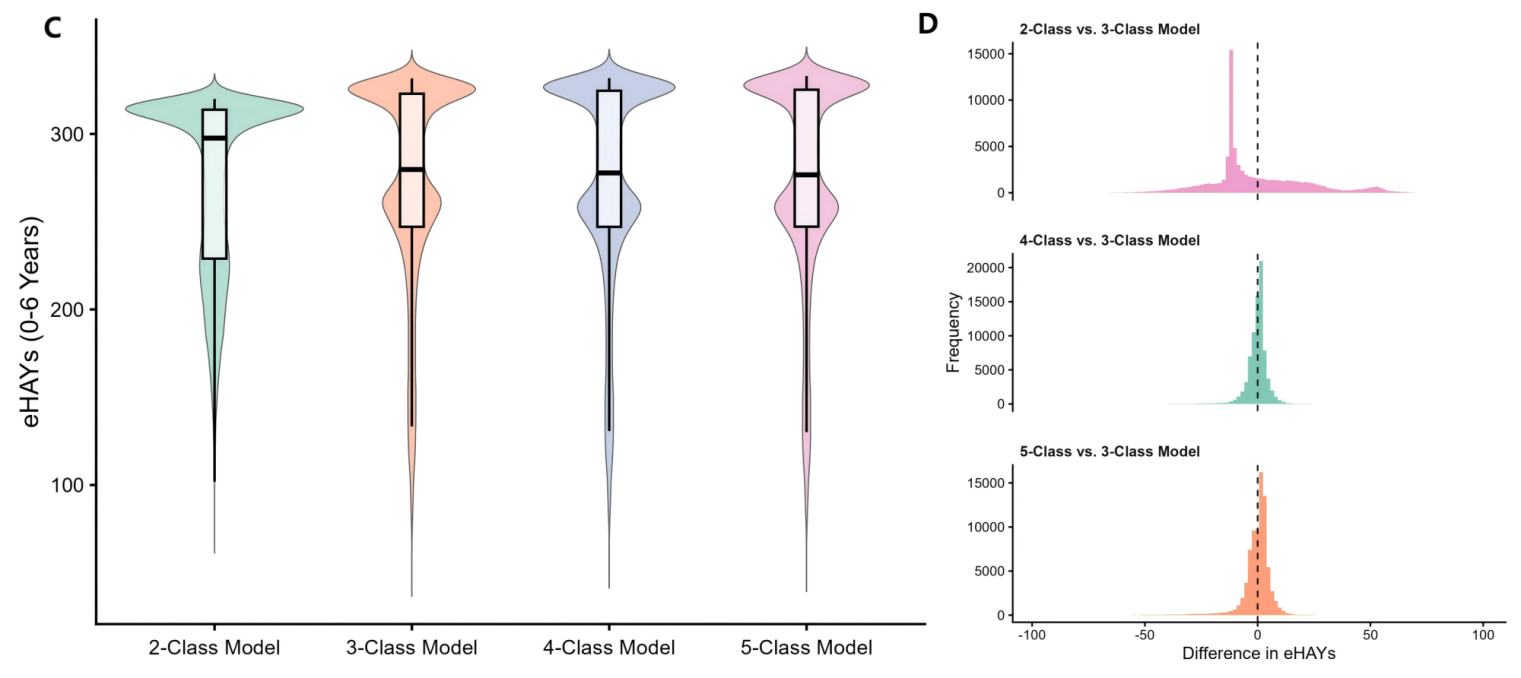


*Figure A (Bland-Altman Plot): The horizontal axis represents the average of the results calculated by the two methods (the joint model predictions and the integrals of the original data). The vertical axis represents the difference between the results calculated by the two methods. The solid red line represents the average deviation; the dashed red line represents the limits of agreement.*

*Figure B (Density Plot): The blue curve represents the probability density estimation curve of the difference between the two methods. The red vertical line marks the position of the mean bias (close to 0 in the figure).*

*Figure C (Violin Plot): Violin Shape illustrates the kernel density distribution for different eHAYs values. The black line in the middle of the boxplot represents the median, the white rectangle represents the interquartile range (IQR), and the extending vertical lines represent the range of observations.*

*Figure D. Histogram of Differences: The horizontal axis represents the estimated difference between different latent class models and the baseline model (3-Class). The vertical axis represents the sample frequency.*

###### Sensitivity: Standardized Marginal Prediction Model for Longitudinal eHAYs under Different τ-year Window


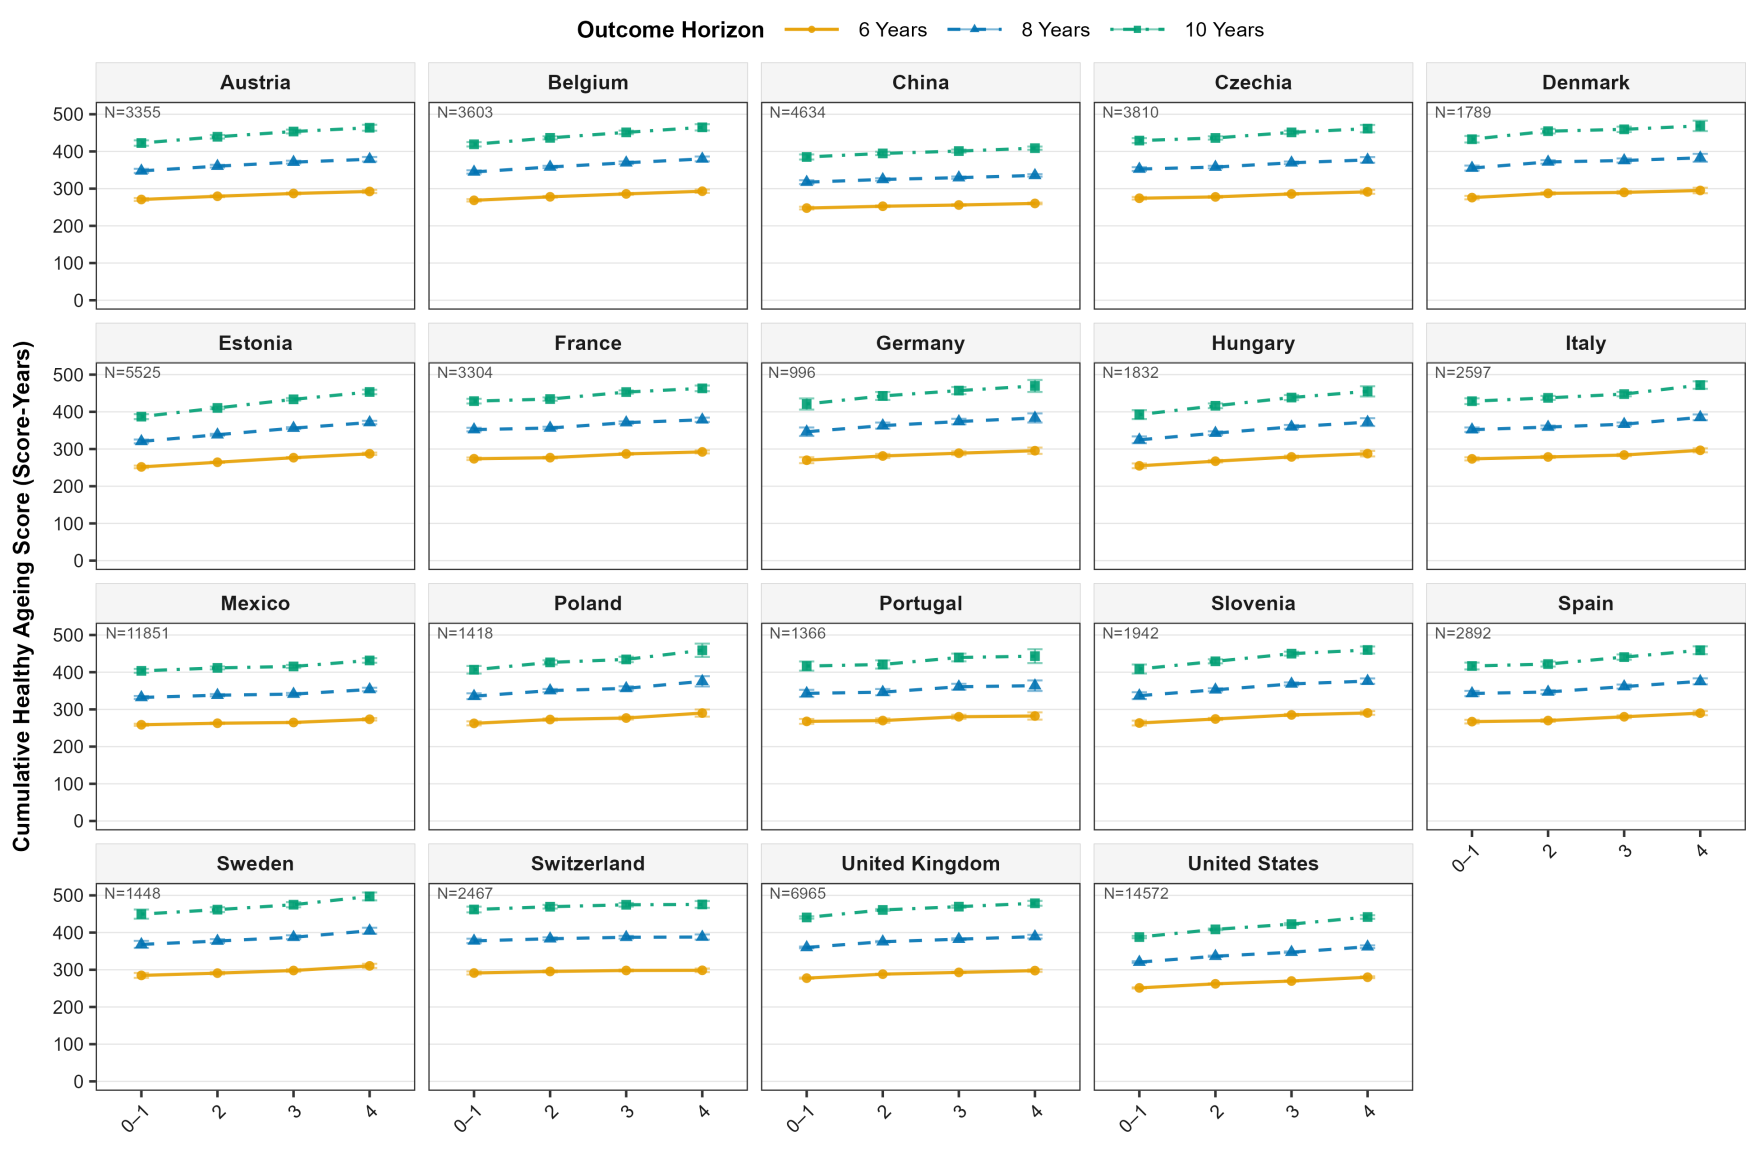


###### Sensitivity: Cross-sectional HAI standardized prediction marginal model excluding the lowest baseline HAI


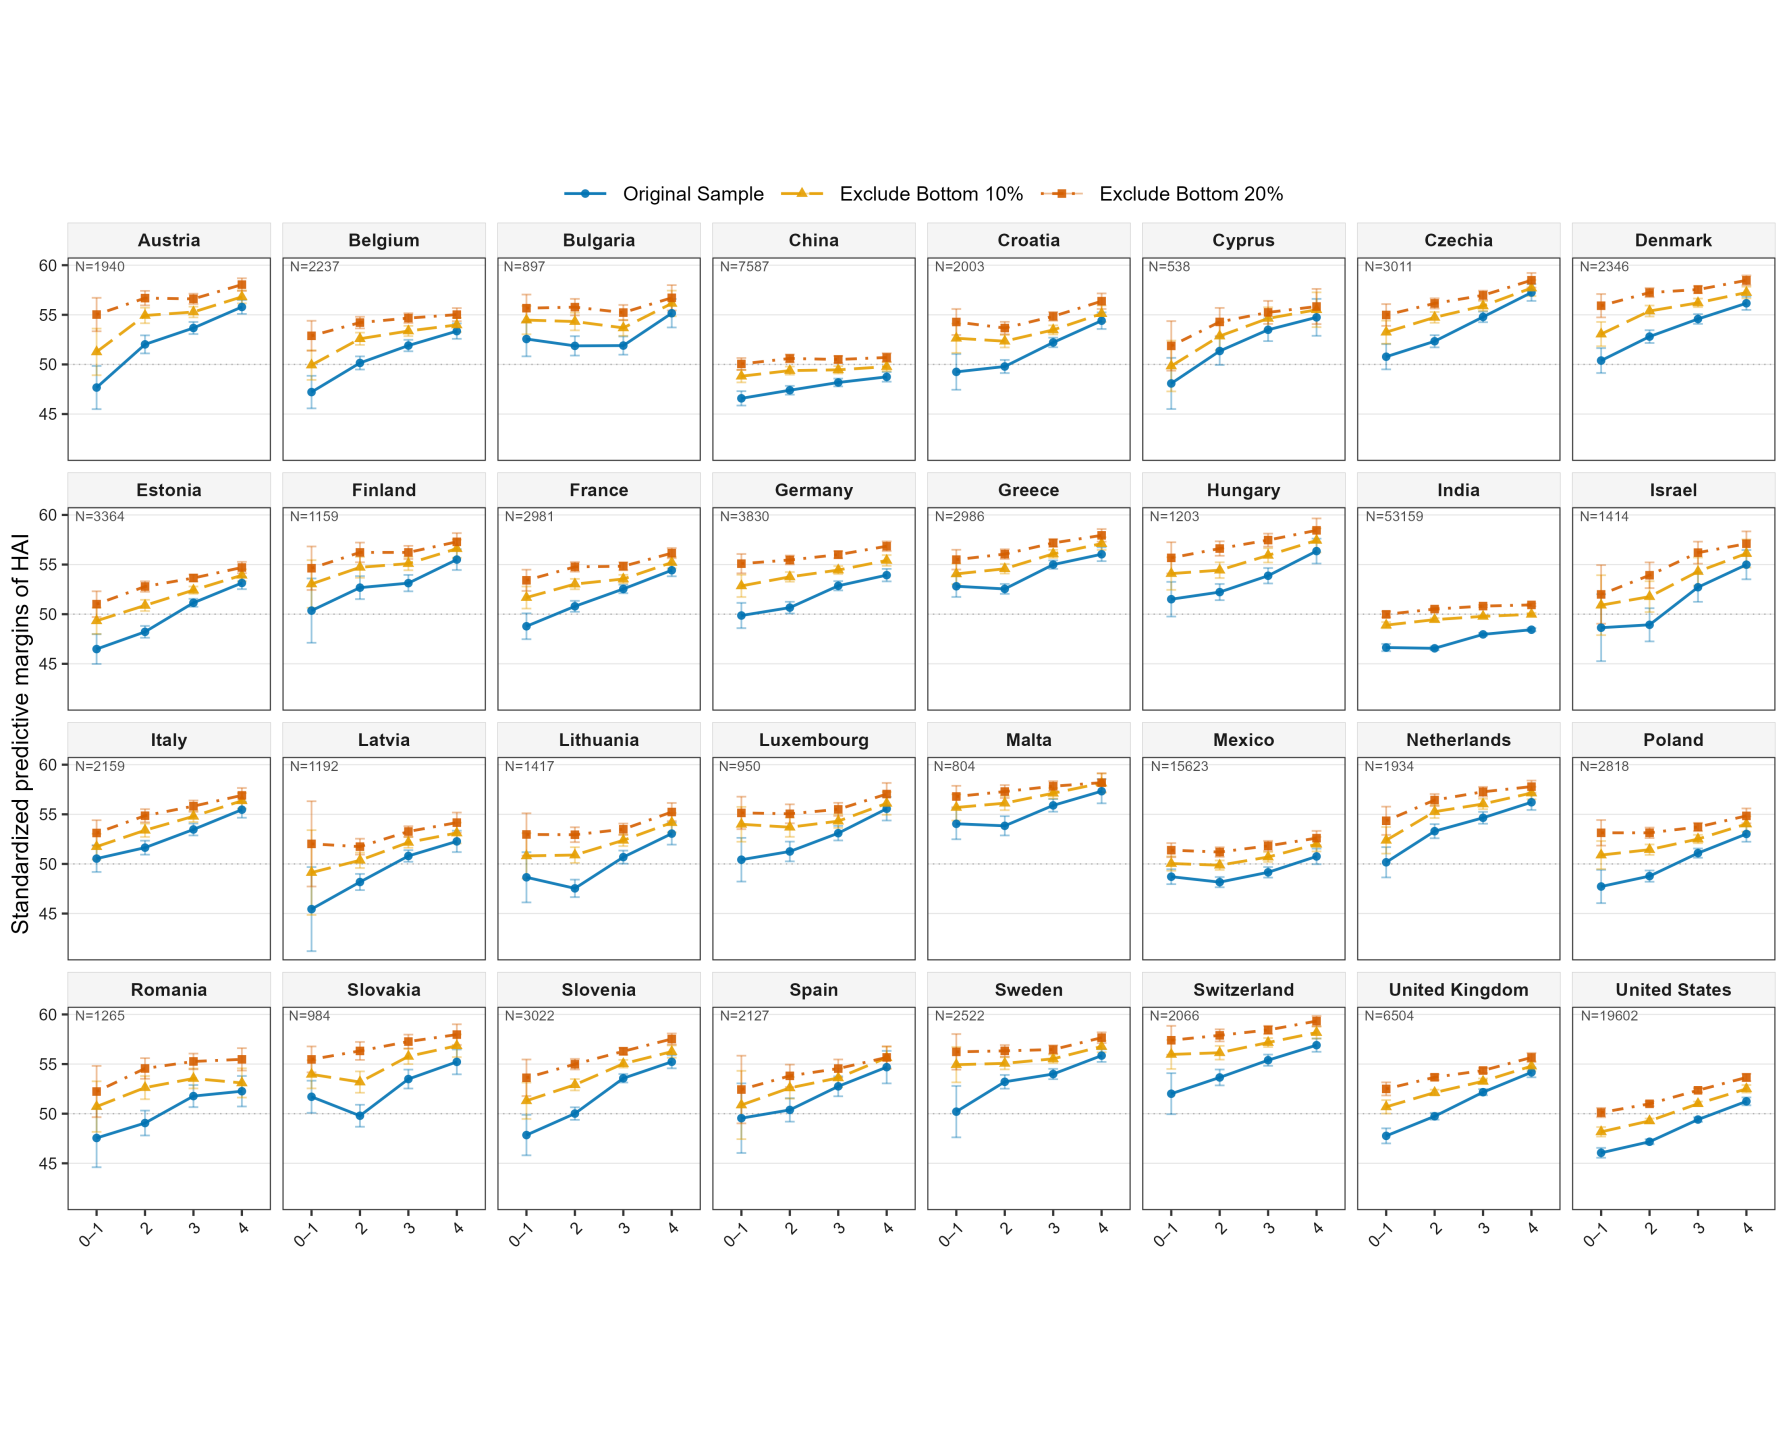


###### Sensitivity: Meta-regression results and model coefficients using the average SDOH from previous years

| **Domain** | **SDOH** | **Beta (per SD) [95% CI] - Most Recent Year** | **q Value**  **(Most Recent Year)** | **Beta (per SD) [95% CI] - Past 3-Year Average** | **q Value**  **(Past 3-Year Average)** | **Beta (per SD) [95% CI] - Past 5-Year Average** | **q Value**  **(Past 5-Year Average)** |
| --- | --- | --- | --- | --- | --- | --- | --- |
| Environment & Climate Change | ND-GAIN Index (Index (typically 0–100)) | 1.187 (0.800, 1.574) | <0.001 | 1.187 (0.800, 1.573) | <0.001 | 1.171 (0.774, 1.568) | <0.001 |
| Environment & Climate Change | Mean PM2.5 Exposure (μg/m³) | -0.860 (-1.258, -0.462) | <0.001 | -0.853 (-1.253, -0.454) | <0.001 | -0.853 (-1.256, -0.451) | <0.001 |
| Environment & Climate Change | Climate Disaster Affected Population (%) | -0.781 (-1.225, -0.337) | 0.003 | -0.781 (-1.225, -0.337) | 0.003 | -0.781 (-1.225, -0.337) | 0.003 |
| Environment & Climate Change | Elderly Heatwave Exposure (Person-days) | -0.724 (-1.184, -0.265) | 0.006 | -0.766 (-1.212, -0.320) | 0.003 | -0.748 (-1.199, -0.297) | 0.004 |
| Environment & Climate Change | Green Space Exposure: Peak NDVI (NDVI value (typically -1 to +1)) | 0.658 (0.070, 1.246) | 0.038 | 0.655 (0.071, 1.240) | 0.037 | 0.594 (-0.001, 1.189) | 0.061 |
| Environment & Climate Change | Industrial CO2 Emissions (Mt) | -0.601 (-1.086, -0.116) | 0.023 | -0.597 (-1.083, -0.111) | 0.024 | -0.597 (-1.083, -0.111) | 0.024 |
| Health System Access, Quality & Financial Protection | Out-of-Pocket Health Spending (%) | -1.143 (-1.435, -0.851) | <0.001 | -1.130 (-1.431, -0.829) | <0.001 | -1.125 (-1.434, -0.816) | <0.001 |
| Health System Access, Quality & Financial Protection | HAQ Index (Index (0–100)) | 0.998 (0.616, 1.380) | <0.001 | 0.998 (0.616, 1.380) | <0.001 | 0.998 (0.616, 1.380) | <0.001 |
| Health System Access, Quality & Financial Protection | Govt. Health Spending (% of Total) | 0.809 (0.348, 1.270) | 0.003 | 0.839 (0.390, 1.288) | 0.002 | 0.824 (0.370, 1.279) | 0.002 |
| Health System Access, Quality & Financial Protection | Impoverishing Health Spending (%) | -0.403 (-1.000, 0.194) | 0.198 | -0.400 (-0.997, 0.197) | 0.201 | -0.433 (-1.026, 0.160) | 0.162 |
| Health System Access, Quality & Financial Protection | Hospital Beds (per 1,000) | 0.274 (-0.335, 0.883) | 0.393 | 0.288 (-0.320, 0.895) | 0.367 | 0.298 (-0.307, 0.904) | 0.346 |
| Inequality & Social Protection | Social Insurance Coverage: Total (%) | 0.997 (0.394, 1.601) | 0.008 | 0.997 (0.394, 1.601) | 0.008 | 0.997 (0.394, 1.601) | 0.008 |
| Inequality & Social Protection | Income Share: Top 10 (%) | -0.849 (-1.342, -0.356) | 0.003 | -0.826 (-1.318, -0.333) | 0.003 | -0.800 (-1.298, -0.301) | 0.005 |
| Inequality & Social Protection | Gini Coefficient (Index (0–1)) | -0.732 (-1.258, -0.206) | 0.012 | -0.701 (-1.230, -0.172) | 0.017 | -0.675 (-1.208, -0.143) | 0.021 |
| Inequality & Social Protection | Social Protection Coverage: Total (%) | 0.725 (-0.186, 1.637) | 0.121 | 0.725 (-0.186, 1.637) | 0.121 | 0.725 (-0.186, 1.637) | 0.121 |
| Inequality & Social Protection | Total Unemployment Rate (%) | -0.206 (-0.845, 0.433) | 0.534 | -0.216 (-0.847, 0.416) | 0.508 | -0.226 (-0.856, 0.404) | 0.486 |
| Inequality & Social Protection | Social Safety Net Coverage: Poorest (%) | -0.093 (-1.223, 1.038) | 0.855 | -0.093 (-1.223, 1.038) | 0.855 | -0.093 (-1.223, 1.038) | 0.855 |
| Socio-economic & Human Capital | Tertiary Education Completion (%) | 1.115 (0.661, 1.570) | <0.001 | 1.126 (0.678, 1.573) | <0.001 | 1.135 (0.687, 1.584) | <0.001 |
| Socio-economic & Human Capital | SDI Index (Index (0–1)) | 1.068 (0.734, 1.403) | <0.001 | 1.068 (0.733, 1.403) | <0.001 | 1.067 (0.732, 1.402) | <0.001 |
| Socio-economic & Human Capital | HDI Index (Index (0–1)) | 1.062 (0.716, 1.408) | <0.001 | 1.064 (0.719, 1.409) | <0.001 | 1.064 (0.723, 1.404) | <0.001 |
| Socio-economic & Human Capital | GDP per Capita (PPP) (International dollars (PPP-adjusted USD)) | 0.923 (0.392, 1.454) | 0.003 | 0.937 (0.410, 1.463) | 0.002 | 0.943 (0.420, 1.466) | 0.002 |
| Socio-economic & Human Capital | Public Education Spending (% of GDP) | 0.869 (0.294, 1.444) | 0.007 | 0.871 (0.292, 1.449) | 0.007 | 0.896 (0.314, 1.478) | 0.006 |
| Urban Environment & Infrastructure | Urban Safe Sanitation Coverage (%) | 1.148 (0.699, 1.596) | <0.001 | 1.148 (0.699, 1.596) | <0.001 | 1.148 (0.700, 1.596) | <0.001 |
| Urban Environment & Infrastructure | Internet Usage (%) | 1.015 (0.680, 1.350) | <0.001 | 1.012 (0.674, 1.349) | <0.001 | 1.009 (0.672, 1.346) | <0.001 |
| Urban Environment & Infrastructure | Urban Clean Cooking Access (%) | 1.004 (0.692, 1.317) | <0.001 | 1.003 (0.690, 1.316) | <0.001 | 1.002 (0.689, 1.315) | <0.001 |
| Urban Environment & Infrastructure | Urban Safe Drinking Water Coverage (%) | 0.771 (0.083, 1.460) | 0.038 | 0.773 (0.085, 1.461) | 0.038 | 0.777 (0.090, 1.463) | 0.039 |
| Urban Environment & Infrastructure | Urban Electricity Access (%) | 0.687 (0.242, 1.132) | 0.006 | 0.680 (0.230, 1.130) | 0.007 | 0.699 (0.251, 1.146) | 0.006 |
| Urban Environment & Infrastructure | Urban Slum Population (%) | -0.546 (-0.968, -0.124) | 0.019 | -0.546 (-0.968, -0.124) | 0.019 | -0.546 (-0.968, -0.124) | 0.02 |
